# Supplementary material
Source: PubMed Central journal article supplement (PMC2920064)
Supplement: NIHMS221124-supplement-1_si_001.pdf [file NIHMS221124-supplement-1_si_001.pdf]

# **Supporting Information**

## **Modular and Versatile Hybrid Coordination Motifs on $\alpha$ -Helical Protein Surfaces**

Robert J. Radford, Phuong C. Nguyen and F. Akif Tezcan\*

University of California, San Diego, Department of Chemistry and Biochemistry, 9500 Gilman Dr. La Jolla,  
CA 92037-0356

## Table of Contents

### Section

|                                                                                                                              |     |
|------------------------------------------------------------------------------------------------------------------------------|-----|
| S1. Experimental Figures.....                                                                                                | S3  |
| S1.1. Representative FPLC trace for the purification of an HCM-bearing protein                                               |     |
| S1.2. Metal binding titration data and fits for HPhen2                                                                       |     |
| S1.3. Metal binding titration data and fits for HPhen3                                                                       |     |
| S1.4. Sedimentation velocity experiments for HTerpy1                                                                         |     |
| S1.5. Chemical unfolding titrations for HPhen1 with $M^{2+}$                                                                 |     |
| S1.6. Chemical unfolding titrations of HPhen2 in the presence of: $Co^{2+}$ , $Ni^{2+}$ , $Cu^{2+}$ and $Zn^{2+}$            |     |
| S1.7. Chemical unfolding titrations of HPhen3 in the presence of: $Co^{2+}$ , $Ni^{2+}$ , $Cu^{2+}$ and $Zn^{2+}$            |     |
| S1.8. Chemical unfolding titrations of HTerpy1 in the presence of: $Co^{2+}$ , $Ni^{2+}$ , $Cu^{2+}$ and $Zn^{2+}$           |     |
| S1.9. Thermal unfolding of 5 $\mu M$ of HPhen1, HQuin1 and HTerpy1 in the presence of $Ni^{2+}$                              |     |
| S1.10. Chemical unfolding titrations of cyt <i>cb</i> <sub>562</sub> -G70C-CM in the presence and absence of $Ni^{2+}$       |     |
| S1.11. Chemical unfolding titrations of APhen1 in the presence and absence of $M^{2+}$                                       |     |
| S1.12. Sedimentation equilibrium experiments of HPhen1 with $Ni^{2+}$                                                        |     |
| S1.13. UV-visible spectra of Ru( <i>p</i> -cymene)-HPhen1 and cyt <i>cb</i> <sub>562</sub> -G70C-CM                          |     |
| S1.14. Difference spectra comparing Ru( <i>p</i> -cymene)-HPhen1 with cyt <i>cb</i> <sub>562</sub> -G70C-CM                  |     |
| S1.15. Fluorescence spectra of Ru( <i>p</i> -cymene)-HPhen1 and cyt <i>cb</i> <sub>562</sub> -G70C-CM                        |     |
| S1.16. ESI MS Spectra of IA-Phen                                                                                             |     |
| S1.17. ESI MS Spectra of IA-Quin                                                                                             |     |
| S1.18. ESI MS Spectra of IA-Terpy                                                                                            |     |
| S1.19. CD wavelength scan of HPhen1 in the presence and absence of $M^{2+}$                                                  |     |
| S2. Experimental Tables.....                                                                                                 | S14 |
| S.2.1 Dissociation constants for HPhen1, 2 and 3 with $M^{2+}$ using 1:1/1:2 model                                           |     |
| S.2.2 Fitting parameters for chemical unfolding titrations for HPhen1, APhen1 and cyt <i>cb</i> <sub>562</sub> with $M^{2+}$ |     |
| S.2.3 Fitting parameters for chemical unfolding titrations for HPhen2 with $M^{2+}$                                          |     |
| S.2.4 Fitting parameters for chemical unfolding titrations for HPhen3 with $M^{2+}$                                          |     |
| S.2.5 Fitting parameters for chemical unfolding titrations for HTerpy1 and ATerpy1 with $M^{2+}$                             |     |
| S.2.6 Fitting parameters for thermal unfolding titrations of HCM variants: HPhen1, HQuin1 and HTerpy1                        |     |
| S.2.7 Total bonding energies for optimized inner-sphere geometry of Ni:HPhen1 dimer complex                                  |     |
| S3. Input files for DFT calculations.....                                                                                    | S19 |
| S4. Output files and figures from DFT calculations.....                                                                      | S30 |

## Section S1. Experimental Figures

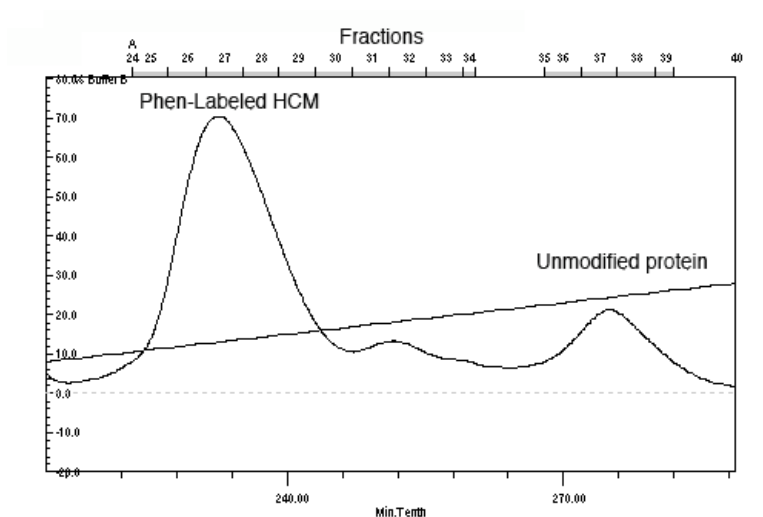

**Figure S1.1** A representative FPLC trace (anion-exchange with a 5 mL Bio-Rad Uno-Q cartridge) for the purification of a HPhen2. Protein was prepared in 10 mM sodium phosphate buffer (pH 8) and eluted with a linear gradient of buffer B (0-50% 0.5 M NaCl in 10 mM sodium phosphate (pH 8)). Labeled protein generally elutes between 17.5 and 22% of buffer B. The trace shows three peaks with fractions 25-29 representing pure labeled protein, fractions 31-33 representing labeled protein as the major product along with a small unlabeled impurity, and fractions 36-39 corresponding to unlabeled protein.

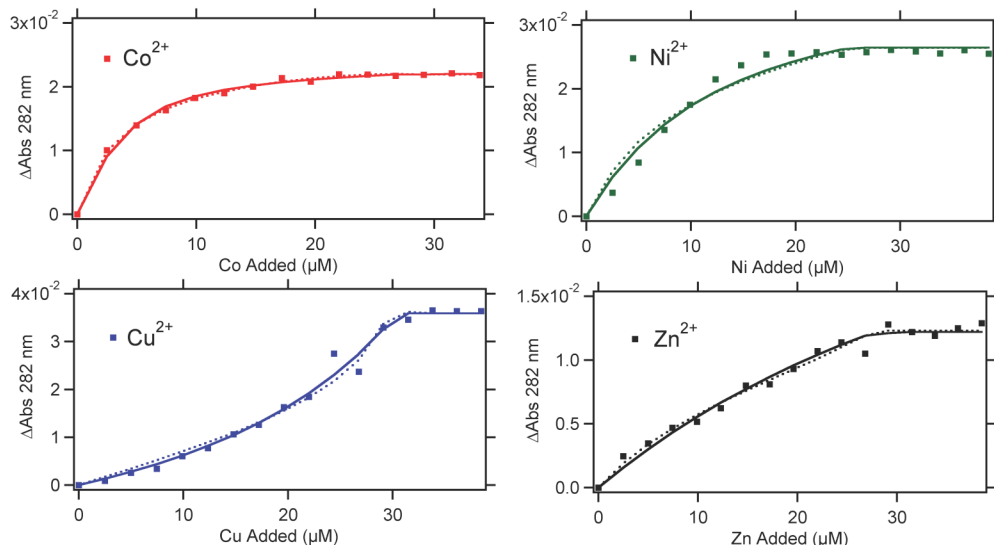

**Figure S1.2** Titrations of HPhen2 with late first row transition metals as monitored by UV-vis spectroscopy. See Experimental Section for details. The data were fit to two different models. The first model assumes a simple 1:1 binding (solid line) and the second model uses a 1:1 and 1:2 mechanism (dotted line) the latter of which accounts for protein dimerization. In every case, the data were satisfactorily described by the 1:1 model. Corresponding  $K_d$ 's can be found in Tables 1 and S2.1.

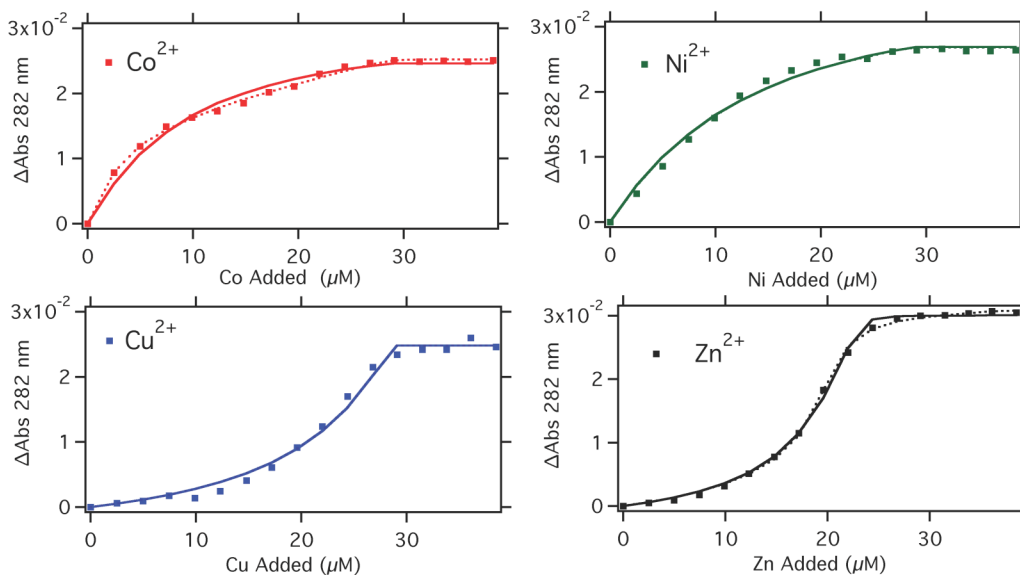

**Figure S1.3.** Titrations of HPhen3 with late first row transition metals as monitored by UV-vis spectroscopy. See Experimental Section for details. The data were fit to two different models. The first model assumes a simple 1:1 binding (solid line) and the second model uses a 1:1 and 1:2 mechanism (dotted line) the latter of which accounts for protein dimerization. In every case, the data were satisfactorily described by the 1:1 model. Corresponding  $K_d$ 's can be found in Tables 1 and S2.1.

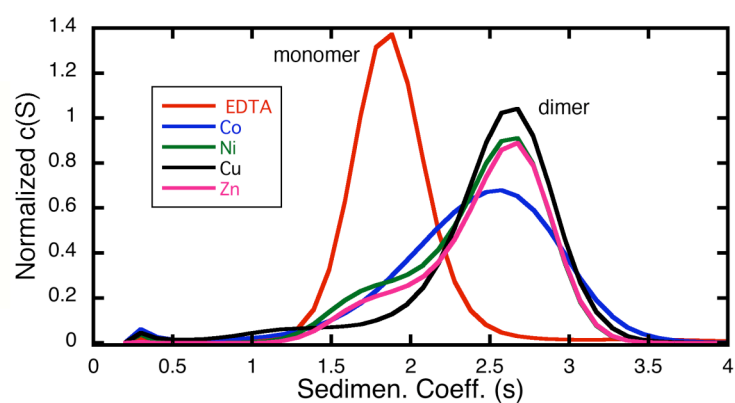

**Figure S1.4.** Sedimentation velocity profiles for HTerpy1 performed under similar conditions as metal binding titrations (5  $\mu\text{M}$  HTerpy1 and 2.5  $\mu\text{M}$  of  $\text{M}^{2+}$ ). With every metal tested ( $\text{Co}^{2+}$  (blue),  $\text{Ni}^{2+}$  (green),  $\text{Cu}^{2+}$  (black),  $\text{Zn}^{2+}$  (pink) Metal free/EDTA (Red)), a dimeric species (2.6 S) is the major species present.

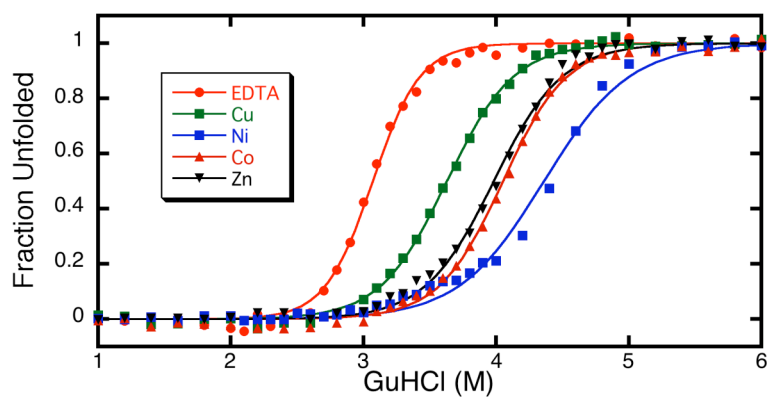

**Figure S1.5.** Chemical unfolding titrations for HPhen1 in the presence and absence (EDTA) of late first-row transition metals as monitored by CD spectroscopy. Titration data were fit assuming a two-state unfolding model. Fitting parameters are given in Table S2.2.

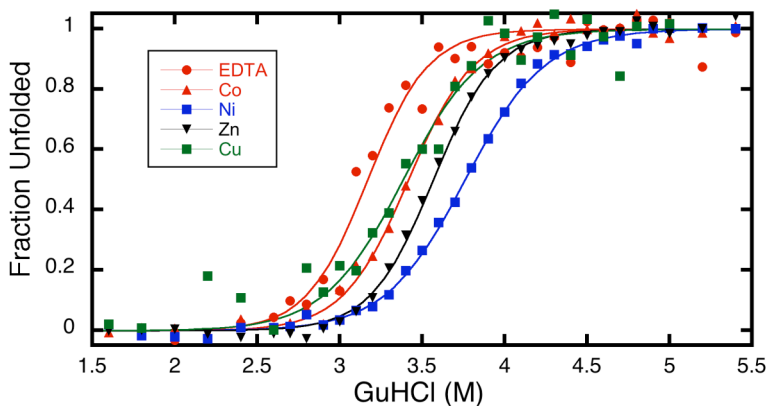

**Figure S1.6.** Chemical unfolding titrations for HPhen2 in the presence and absence (EDTA) of late first-row transition metals as monitored by CD spectroscopy. Titration data were fit assuming a two-state unfolding model. Fitting parameters are given in Table S2.3.

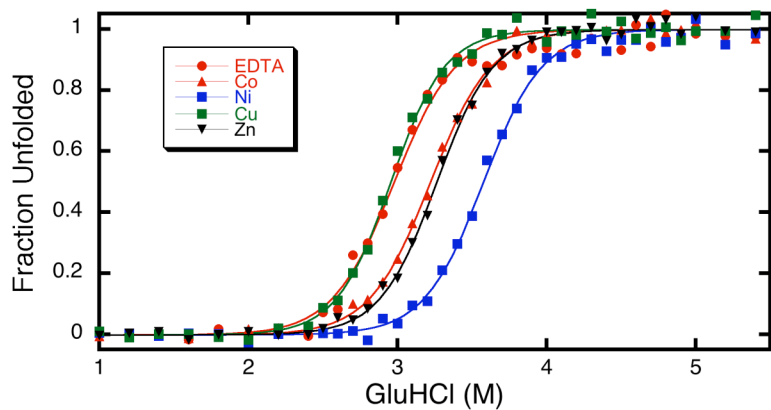

**Figure S1.7.** Chemical unfolding titrations for HPhen3 in the presence and absence (EDTA) of late first-row transition metals as monitored by CD spectroscopy. Titration data were fit assuming a two-state unfolding model. Fitting parameters are given in Table S2.4.

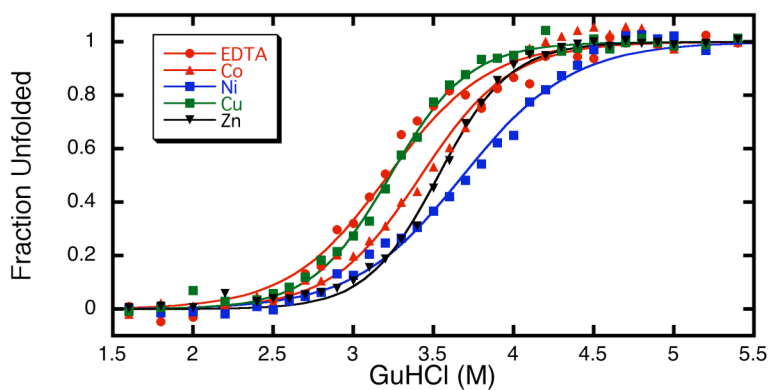

**Figure S1.8.** Chemical unfolding titrations of HTerpy1 in the presence and absence (EDTA) of late first-row transition metals, as monitored by circular dichroism (CD) spectroscopy. Titration data were fit assuming a two-state unfolding model. Fitting parameters are given in Table S2.5.

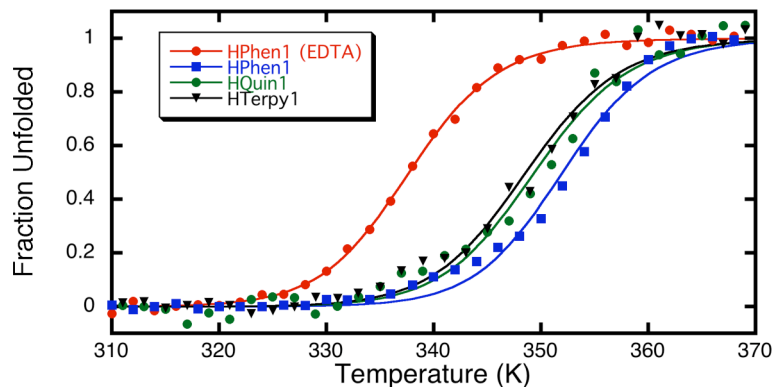

**Figure S1.9.** Thermal unfolding of 5  $\mu\text{M}$  HPhen1, HQuin1 and HTerpy1 in the presence and absence (EDTA) of 1 mM  $\text{Ni}^{2+}$  as monitored by CD spectroscopy. Titrations were performed in 100 mM Tris buffer (pH 7.5) with 1.5 M GuHCl and fit to a two-state unfolding model. Fitting parameters are given in Table S2.6.

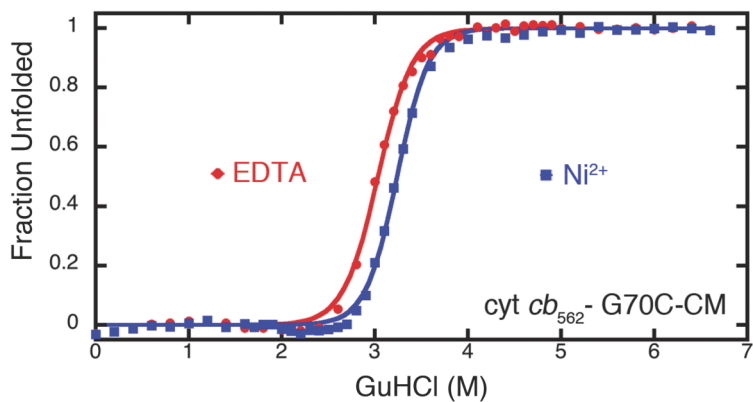

**Figure S1.10.** Chemical unfolding titration of G70C-CM *cyt cb<sub>562</sub>* in the presence and absence (EDTA) of  $\text{Ni}^{2+}$  as monitored by CD spectroscopy.



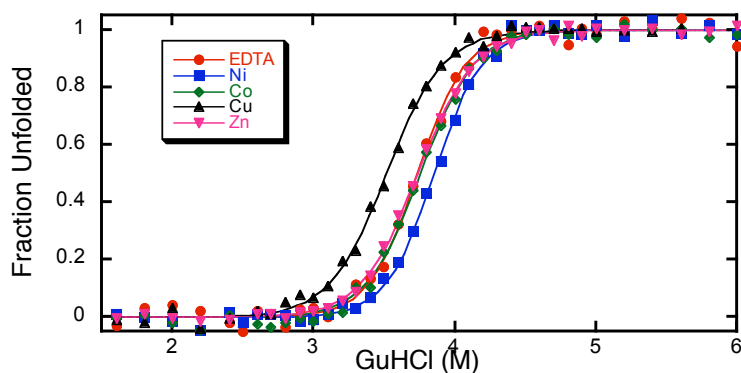

**Figure S1.11.** Chemical unfolding titration of APhen1 in the presence and absence (EDTA) of  $M^{2+}$  as monitored by CD spectroscopy.

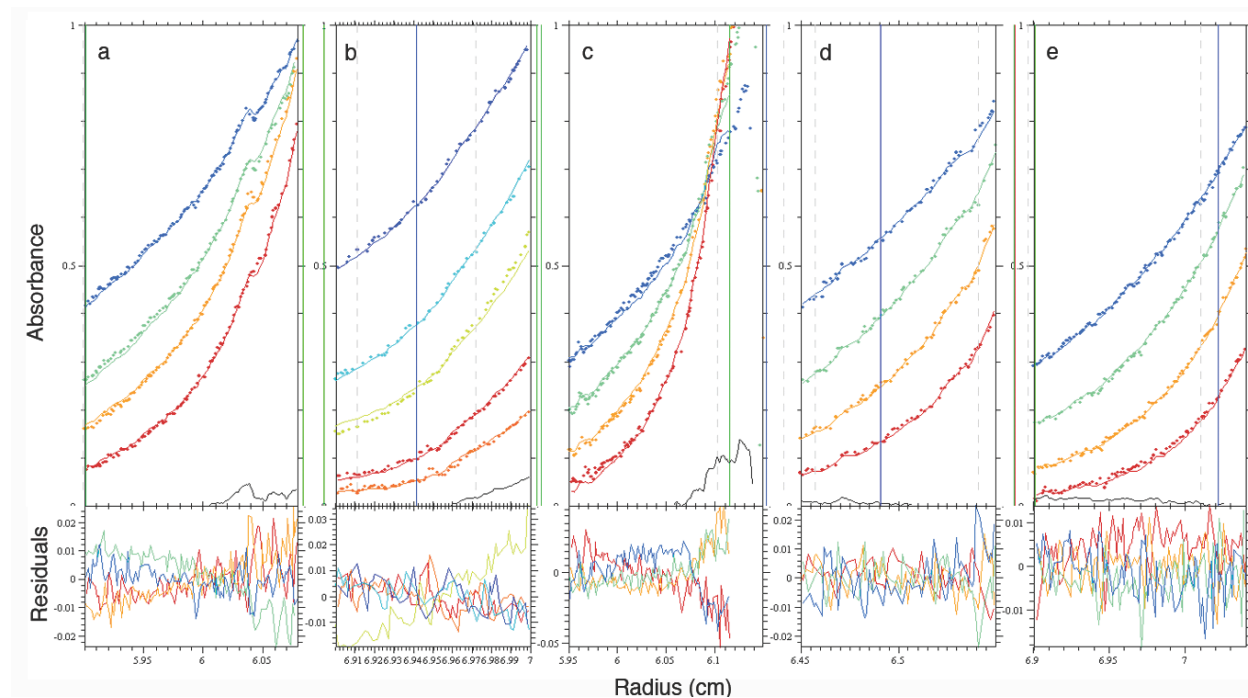

**Figure S1.12.** Sedimentation equilibrium profiles for HPhen1 in the presence of  $Ni^{2+}$ . (a) 10  $\mu M$  (b) 20  $\mu M$  (c) 40  $\mu M$  (d) 60  $\mu M$  and (e) 100  $\mu M$ . Scans of each sample were taken after the samples were equilibrated at the following speeds for 14 hrs: 20,000 rpm (blue), 25,000 rpm (green), 30,000 rpm (yellow), 35,000 rpm (red) and 41,000 rpm (orange) rpm. All samples were in 20 mM TRIS buffer (pH 7) with a half equivalent of  $NiSO_4$ . Scans shown in a), b) and c) were globally fit to a monomer-dimer model yielding a minimized fit with a  $\log K_{d(2mer-1mer)} = 5.05 \pm 0.02 M^{-1}$  or  $K_{d(2mer-1mer)} = 8.9(1) \mu M$ . Experiments were conducted at 25°C.

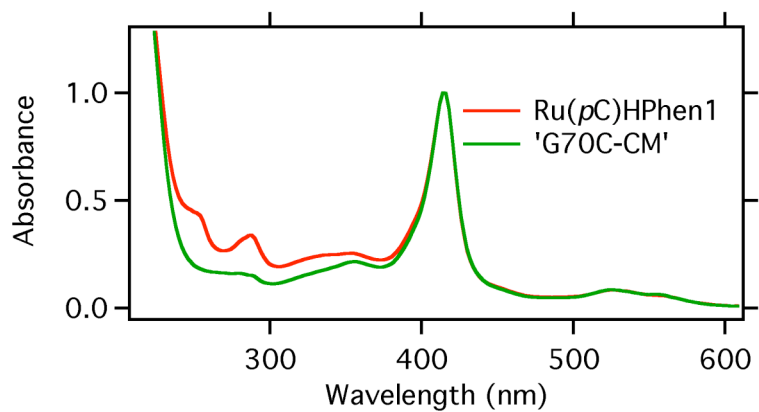

**Figure S1.13.** UV-visible spectra of Ru(*p*-cymene)-HPhen1 complex and G70C-CM cyt *cb*<sub>562</sub>.

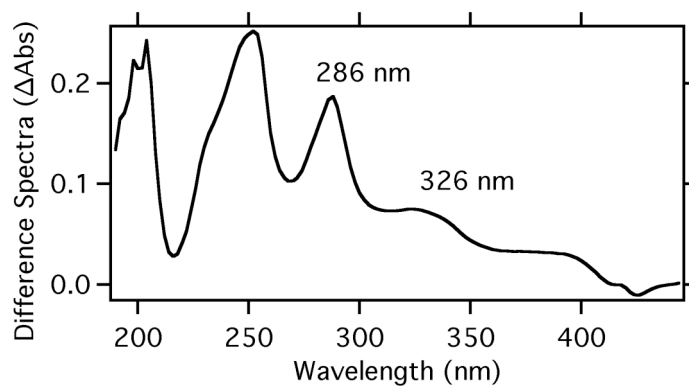

**Figure S1.14.** Difference spectrum (from Fig. S1.13) highlighting the changes in absorbance upon the formation of the Ru(*p*-cymene)-HPhen1 complex.

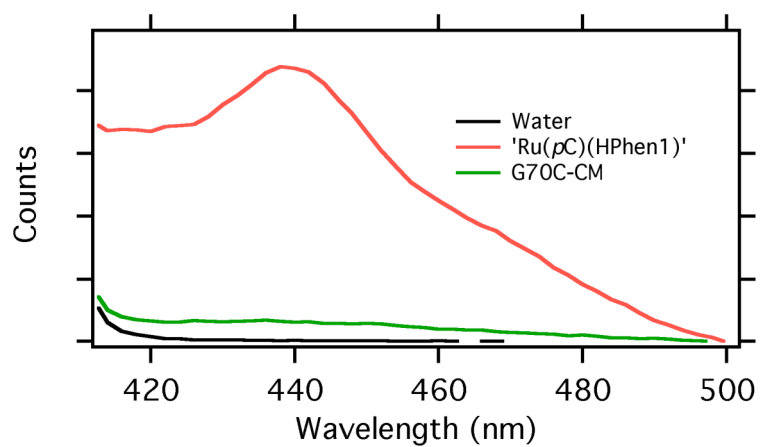

**Figure S1.15.** Fluorescence spectrum of 5  $\mu\text{M}$  Ru(*p*-cymene)-HPhen1 as compared with that of 5  $\mu\text{M}$  G70C-CM cyt *cb*<sub>562</sub>. Spectra were taken in water and prepared anaerobically. ( $\lambda_{\text{ex}} = 326 \text{ nm}$ ;  $\lambda_{\text{em}} = 442 \text{ nm}$ )

IPhe #13-16 RT: 0.11-0.13 AV: 4 SB: 9 0.01-0.08 NL: 1.87E7  
T: + c Full ms [200.00-500.00]

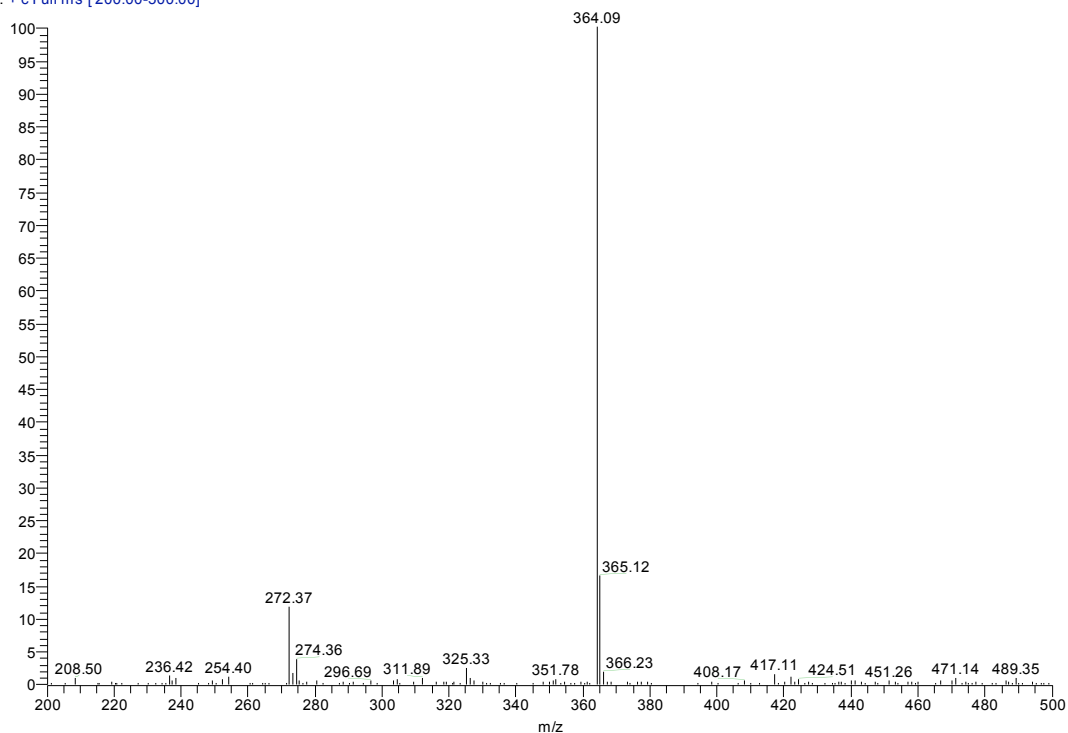

**Figure S1.16.** ESI-MS (positive mode) of 5-iodoacetamido-1,10-phenanthroline (IA-Phen). Measured MW = 364.09 m/z (exp.: 363.99) ( $M + H^+$ )

QuinDMSO\_2 #35-40 RT: 0.27-0.31 AV: 6 SB: 29 0.02-0.25 NL: 1.15E7  
T: + c Full ms [200.00-400.00]

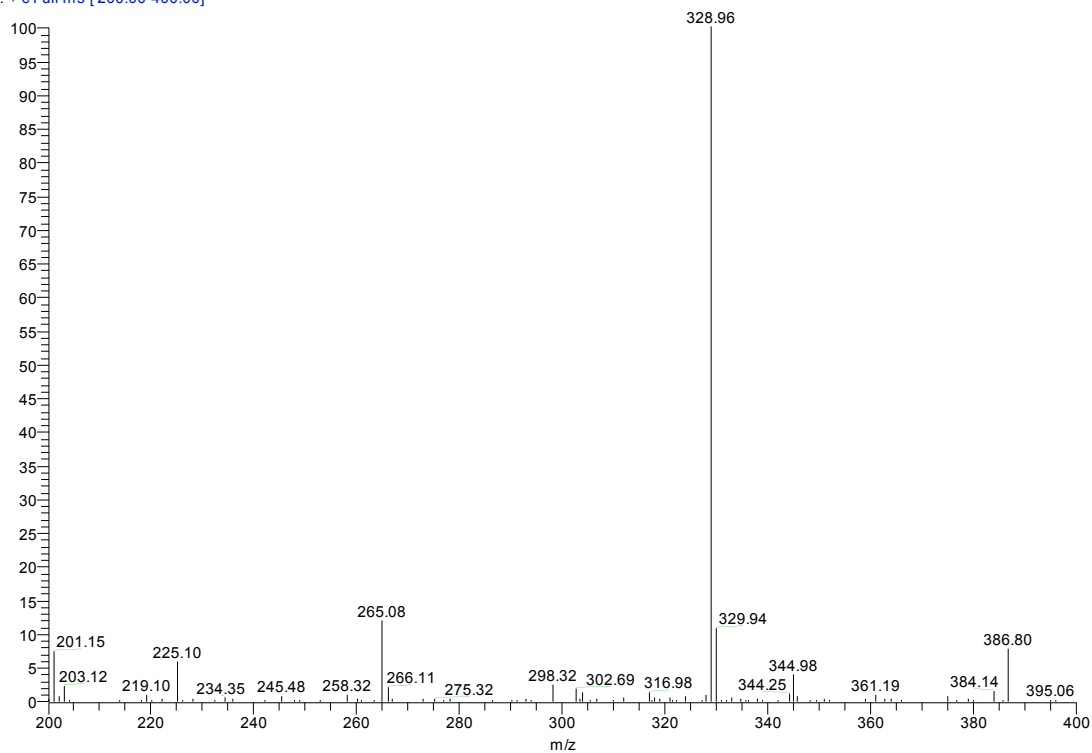

**Figure S1.17.** ESI-MS (positive mode) of 5-iodoacetamido-8-hydroxyquinoline (IA-Quin). Measured MW = 328.96 m/z (exp.: 363.99) ( $M + H^+$ )

IA\_terpy#50-54 RT: 0.56-0.59 AV: 5 SB: 36 0.12-0.51 NL: 2.67E8  
T: + c Full ms [ 150.00-500.00]

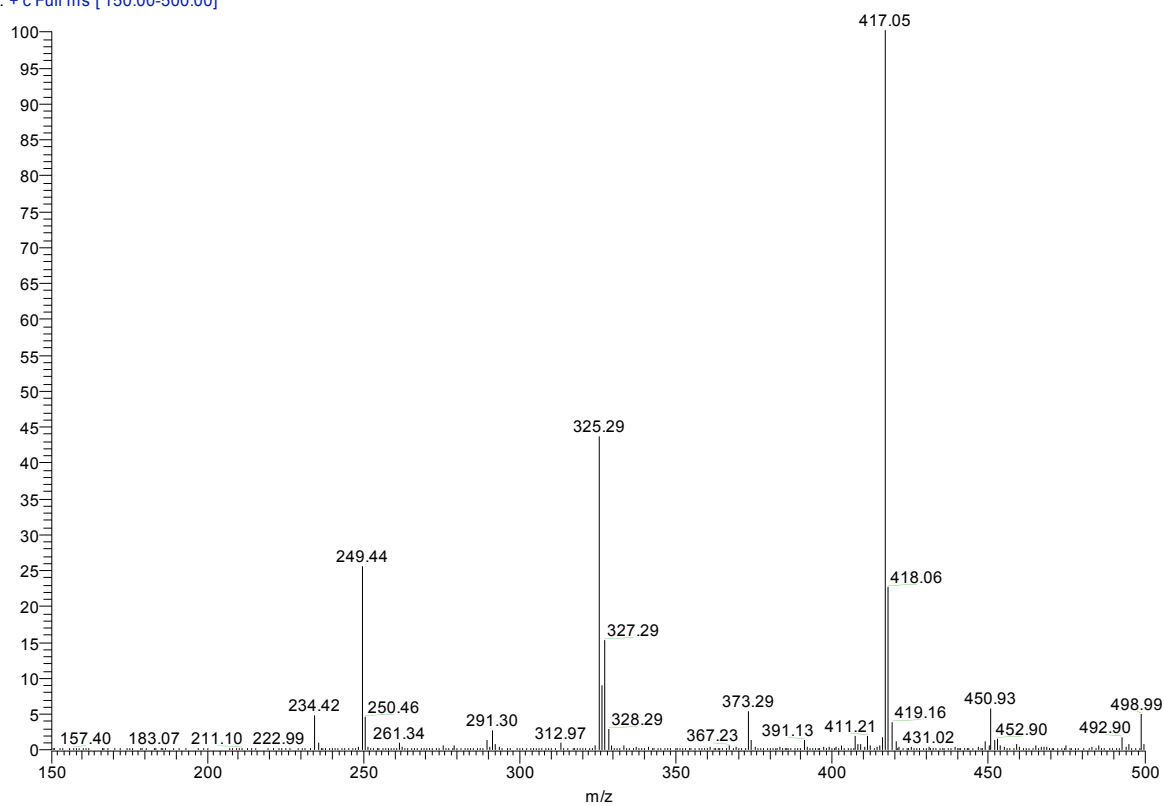

**Figure S1.18.** ESI-MS (positive mode) of 4-iodoacetamido-2,2':6',2''-terpyridine (ITerpy). Measured MW = 417.05 m/z (exp.: 417.22) ( $M + H^+$ ). Observed peaks at 325.29 and 249.44 m/z correspond to 4-chloroacetamido-2,2':6',2''-terpyridine (CIA-Terpy) and 4-amino-2,2':6',2''-terpyridine ( $NH_2$ -Terpy) respectively.

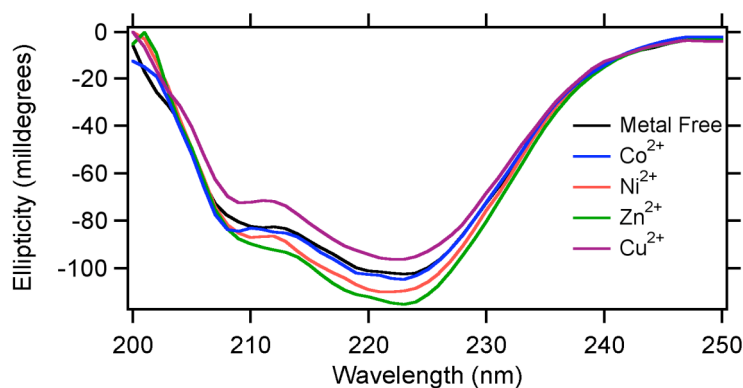

**Figure S1.19.** Wavelength scan of 6  $\mu$ M HPhen1 in 20 mM sodium borate buffer (pH 7) at 25  $^{\circ}$ C and 200  $\mu$ M of either EDTA (no metal) or  $M^{2+}$  as monitored by CD spectroscopy. Data shown are averages of 3 scans and was smoothed with a binomial function.

## Section S2. Experimental Tables.

|                  | Dissociation Constants ( $K_d$ ) |                          |                          |
|------------------|----------------------------------|--------------------------|--------------------------|
|                  | HPhen1 (M)                       | HPhen2 (M)               | HPhen3 (M)               |
| Co <sup>2+</sup> | 4 (4) $\times 10^{-10}$          | 5 (2) $\times 10^{-9}$   | 2 (6) $\times 10^{-10}$  |
| Ni <sup>2+</sup> | 2 (80) $\times 10^{-9}$          | 6 (24) $\times 10^{-11}$ | 2 (15) $\times 10^{-10}$ |
| Cu <sup>2+</sup> | 6 (4) $\times 10^{-13}$          | 1 (15) $\times 10^{-11}$ | 2 (11) $\times 10^{-11}$ |
| Zn <sup>2+</sup> | 3 (3) $\times 10^{-8}$           | 5 (3) $\times 10^{-8}$   | 2 (2) $\times 10^{-7}$   |

**Table S2.1.** Dissociation constants for metal binding titrations for the HPhen series with M<sup>2+</sup>. Data were fit using a 1:1/1:2 model, which accounts for both metal binding and protein dimerization. In all cases EGTA was used as competing ligand. EGTA:metal dissociation constants were determined using Maxchelator (<http://maxchelator.stanford.edu>) (25° C and a ionic strength of 0.05 M) and were held fixed during regression analysis.

| Cyt <i>cb</i> <sub>562</sub> variant | Condition        | Slope, $m_1$<br>(kcal/mol•M) | [GuHCl] <sub>m</sub> , $m_2$ (M) |
|--------------------------------------|------------------|------------------------------|----------------------------------|
| HPhen1                               | EDTA             | 3.2(1)                       | 3.07 (1)                         |
| HPhen1                               | Co               | 2.42 (5)                     | 4.05 (1)                         |
| HPhen1                               | Ni               | 1.82 (7)                     | 4.36 (1)                         |
| HPhen1                               | Cu               | 2.33 (7)                     | 3.63 (1)                         |
| HPhen1                               | Zn               | 2.26 (6)                     | 3.98 (1)                         |
| G70C-CM                              | EDTA             | 2.9(1)                       | 3.06(1)                          |
| G70C-CM                              | Ni               | 3.6(1)                       | 3.24(1)                          |
| APhen1                               | EDTA             | 3.4 (1)                      | 3.73 (1)                         |
| APhen1                               | Co               | 3.1 (1)                      | 3.75 (1)                         |
| APhen1                               | Ni               | 3.4 (1)                      | 3.85 (1)                         |
| APhen1                               | Cu               | 2.9 (1)                      | 3.51 (1)                         |
| APhen1                               | Zn               | 2.9 (1)                      | 3.73 (1)                         |
| HPhen1                               | EDTA<br>(pH 5.5) | 3.4 (1)                      | 4.51 (1)                         |
| HPhen1                               | Ni<br>(pH 5.5)   | 2.8 (1)                      | 4.83 (1)                         |

**Table S2.2.** Fitting parameters for chemical unfolding titrations of cyt *cb*<sub>562</sub> variants: HPhen1, APhen1, G70C-CM cyt *cb*<sub>562</sub>.

| Cyt <i>cb</i> <sub>562</sub> variant | Condition | Slope, $m_1$<br>(kcal/mol•M) | [GuHCl] <sub>m</sub> , $m_2$ (M) |
|--------------------------------------|-----------|------------------------------|----------------------------------|
| HPhen2                               | EDTA      | 3.1 (3)                      | 3.16 (2)                         |
| HPhen2                               | Co        | 2.96 (1)                     | 3.41 (1)                         |
| HPhen2                               | Ni        | 2.42 (1)                     | 3.76 (1)                         |
| HPhen2                               | Cu        | 2.4 (2)                      | 3.38 (2)                         |
| HPhen2                               | Zn        | 3.08 (1)                     | 3.56 (1)                         |

**Table S2.3.** Fitting parameters for chemical unfolding titrations for HPhen2 with  $M^{2+}$ .

| <b>Cyt <i>cb</i><sub>562</sub> variant</b> | <b>Condition</b> | <b>Slope, <i>m</i><sub>1</sub><br/>(kcal/mol•M)</b> | <b>[GuHCl]<sub>m</sub>, <i>m</i><sub>2</sub> (M)</b> |
|--------------------------------------------|------------------|-----------------------------------------------------|------------------------------------------------------|
| HPhen3                                     | EDTA             | 2.83 (2)                                            | 2.97 (1)                                             |
| HPhen3                                     | Co               | 2.86 (2)                                            | 3.21 (1)                                             |
| HPhen3                                     | Ni               | 2.96 (1)                                            | 3.57 (1)                                             |
| HPhen3                                     | Cu               | 3.22 (1)                                            | 2.95 (1)                                             |
| HPhen3                                     | Zn               | 3.07 (1)                                            | 3.26 (1)                                             |

**Table S2.4.** Fitting parameters for chemical unfolding titrations for HPhen3 with M<sup>2+</sup>.

| <b>Cyt <i>cb</i><sub>562</sub> variant</b> | <b>Condition</b> | <b>Slope, <i>m</i><sub>1</sub><br/>(kcal/mol•M)</b> | <b>[GuHCl]<sub>m</sub>, <i>m</i><sub>2</sub> (M)</b> |
|--------------------------------------------|------------------|-----------------------------------------------------|------------------------------------------------------|
| HTerpy1                                    | EDTA             | 1.89 (1)                                            | 3.21 (1)                                             |
| HTerpy1                                    | Co               | 2.41 (1)                                            | 3.42 (1)                                             |
| HTerpy1                                    | Ni               | 1.73 (1)                                            | 3.68 (1)                                             |
| HTerpy1                                    | Cu               | 2.40 (1)                                            | 3.22 (1)                                             |
| HTerpy1                                    | Zn               | 2.66 (1)                                            | 3.53 (1)                                             |
| HTerpy1                                    | EDTA (pH 5)      | 2.67 (1)                                            | 4.46 (1)                                             |
| HTerpy1                                    | Ni (pH 5)        | 2.54 (1)                                            | 4.58 (1)                                             |
| ATerpy1                                    | EDTA             | 2.72 (1)                                            | 3.56 (1)                                             |
| ATerpy1                                    | Ni               | 3.24(1)                                             | 3.59 (1)                                             |

**Table S2.5.** Fitting parameters for chemical unfolding titrations for HTerpy1 and ATerpy1.

| <b>HCM variant</b> | <b>Condition</b> | <b>T<sub>m</sub> (K)</b> | <b>slope (kJ/mol)</b> |
|--------------------|------------------|--------------------------|-----------------------|
| HPhen1             | EDTA             | 337 (1)                  | 54 (1)                |
| HPhen1             | Ni               | 352 (1)                  | 59 (2)                |
| HQuin1             | Ni               | 349 (1)                  | 55 (4)                |
| HTerpy1            | Ni               | 348 (1)                  | 54 (3)                |

**Table S2.6.** Fitting parameters for thermal unfolding titrations of HCM variants: HPhen1, HQuin1 and HTerpy1



| Model                                       | Total Bonding Energy (kcal mol <sup>-1</sup> ) | $\Delta E$ (kcal mol <sup>-1</sup> ) |
|---------------------------------------------|------------------------------------------------|--------------------------------------|
| <b><i>cis</i>-HPhen<sub>2</sub>:Ni BP86</b> | <b>-10804.01</b>                               | 5.35                                 |
| <i>trans</i> -HPhen <sub>2</sub> :Ni        | -10798.66                                      |                                      |
| <b><i>cis</i>-Phen<sub>2</sub>:Ni OLYP</b>  | <b>-10517.02</b>                               | 5.01                                 |
| <i>trans</i> -HPhen <sub>2</sub> :Ni OLYP   | -10512.01                                      |                                      |

**Table S2.7.** Total bonding energies for geometry optimized models. Lowest energy isomer and corresponding total bonding energy are in bold.  $\Delta E = |trans \text{ isomer} - cis \text{ isomer}|$ .

## Section S3. Input Files For Density Functional Calculations

### S3.1. Input file for inner-coordination sphere of the *cis*-HPhen1<sub>2</sub>:Ni<sup>2+</sup> complex (BP86).

```
#$ -S /bin/bash
#$ -cwd

#$ -o output
#$ -e $JOB_ID.err
#$ -j y
#$ -M rradford@ucsd.edu
#$ -m beas
#$ -N phentransu
#$ -q adf.q
#$ -pe mpi 8

export cur_dir="`pwd`"
echo Running as user `whoami` on `hostname` at `date` in dir `pwd`
export temp_dir="/state/partition1/`whoami`.$JOB_ID"
mkdir $temp_dir
cd $temp_dir
echo With temp dir $temp_dir

# ADF enviroment variables, change as you need

export ADFHOME=/share/apps/adf2007.01/
export ADFBIN=/share/apps/adf2007.01/bin
export ADFRESOURCES=/share/apps/adf2007.01/atomicdata
export SCMLICENSE=/share/apps/adf2007.01/license
export SCM_TMPDIR=$temp_dir
export SCM_USETMPDIR=yes
export NSCM=8
export SCM_IOBUFFERSIZE=512

#Put main code here *****

$ADFBIN/adf -n8 \
<<< "
TITLE Nicis geo opt

MAXMEMORYUSAGE 7000

RELATIVISTIC ZORA
CHARGE 2 3
UNRESTRICTED

SCF
  ITERATIONS 200
DIIS
END

XC
  LDA VWN
  GGA Becke Perdew
END

SYMMETRY NOSYM
```

## ATOMS

|    |             |             |             |
|----|-------------|-------------|-------------|
| C  | 0.00000000  | 0.00000000  | 0.00000000  |
| C  | 1.49256122  | 0.00000000  | 0.00000000  |
| C  | 2.42693295  | 1.01015667  | 0.00000000  |
| N  | 2.24529015  | -1.16582375 | 0.02218498  |
| C  | 3.56299355  | -0.83228914 | 0.02976203  |
| N  | 3.70228499  | 0.48144472  | 0.01702533  |
| C  | 10.99154846 | 3.29300696  | -0.91732029 |
| C  | 9.76649252  | 2.57572479  | -0.45595145 |
| C  | 8.42465811  | 2.76330770  | -0.70507607 |
| N  | 9.80690694  | 1.49498046  | 0.41145927  |
| C  | 8.53483249  | 1.07600525  | 0.64896160  |
| N  | 7.67565567  | 1.83081541  | -0.01410612 |
| Ni | 5.65295941  | 1.28472803  | -0.00859172 |
| H  | 10.74625400 | 3.95654088  | -1.75289337 |
| H  | 11.43520195 | 3.90761729  | -0.11919016 |
| H  | 11.76432279 | 2.59203105  | -1.26701389 |
| H  | 10.64217050 | 1.07372238  | 0.79822072  |
| H  | 8.25741807  | 0.24781706  | 1.28724959  |
| H  | 7.96193740  | 3.50267040  | -1.34772477 |
| H  | -0.40717928 | -0.69538441 | -0.74906712 |
| H  | -0.41369760 | -0.28481885 | 0.98041905  |
| H  | -0.37511359 | 1.00135511  | -0.24127110 |
| H  | 2.25463114  | 2.07933432  | -0.00449593 |
| H  | 4.38130839  | -1.54009742 | 0.02399485  |
| H  | 1.87848777  | -2.10952611 | 0.01533945  |
| C  | 4.69855903  | 3.62551319  | -3.91832339 |
| C  | 6.95525440  | -2.59797330 | -1.71575989 |
| C  | 4.82493173  | 3.30322448  | -2.55556408 |
| C  | 6.59448059  | -1.57173263 | -0.83928322 |
| C  | 5.03901876  | 2.65560725  | -4.87776834 |
| C  | 6.86023116  | -2.36135354 | -3.10540865 |
| C  | 5.83549531  | 0.42080423  | -5.40286890 |
| C  | 6.29574577  | -0.85678871 | -5.02648906 |
| C  | 5.49251641  | 1.39752677  | -4.46428509 |
| C  | 6.41742319  | -1.13716794 | -3.63288255 |
| C  | 5.60236718  | 1.12009014  | -3.07825958 |
| C  | 6.06831524  | -0.14251271 | -2.65864971 |
| H  | 6.37948554  | -1.10621310 | -7.06050337 |
| C  | 4.55281559  | 5.02059536  | 2.00871462  |
| C  | 6.83501076  | -1.40804771 | 3.46938692  |
| C  | 4.92317427  | 4.10133629  | 1.01120462  |
| C  | 6.70708636  | -0.93097127 | 2.16266644  |
| C  | 4.64776446  | 4.63038406  | 3.35614212  |
| C  | 6.48435915  | -0.55161228 | 4.53602595  |
| C  | 5.20505617  | 2.94175924  | 5.01201474  |
| C  | 5.65999496  | 1.65871079  | 5.37622809  |
| C  | 5.10422279  | 3.34686458  | 3.67888899  |
| C  | 6.01551740  | 0.75629719  | 4.33136710  |
| C  | 5.46545152  | 2.45734126  | 2.63553763  |
| C  | 5.91620355  | 1.16093150  | 2.95677486  |
| H  | 5.77972003  | 2.51833853  | 7.10855185  |
| H  | 4.34972070  | 4.59109841  | -4.21974834 |
| H  | 7.29571029  | -3.54148639 | -1.34323765 |
| H  | 4.57110116  | 4.02864600  | -1.81109536 |
| H  | 6.65641476  | -1.72140320 | 0.21838538  |
| H  | 4.95171578  | 2.87852403  | -5.92064240 |
| H  | 7.13584618  | -3.14383389 | -3.78117552 |

```

H          4.20540236    5.99829608    1.74736174
H          7.19049349   -2.39954196    3.65772485
H          4.85717991    4.37992148   -0.01978279
H          6.96446737   -1.55718134    1.33410385
H          4.37187037    5.31264037    4.13287167
H          6.57952556   -0.91303750    5.53863014
N          6.53384187   -1.54391308   -6.17473091
N          6.17197396   -0.40312850   -1.32792989
N          5.26394220    2.08581038   -2.18284070
N          5.36006422    2.87344891    1.34557680
N          6.26208552    0.31021958    1.95269374
N          5.63233111    1.60284057    6.73419909
H          6.35379620    0.99043632    7.05738502
H          6.86337833   -2.48716750   -6.13378188
H          5.74549280    0.65106919   -6.44391529
H          4.92724985    3.62946358    5.78323869
END

```

```

GEOMETRY
GO
ITERATIONS 100
FREQUENCIES
END

```

```

BASIS
type TZ2P
core none
END

```

```

END INPUT

```

```

"
# end main code *****

```

```

cp * $cur_dir/

```

```

# Optional, have to manually clean up otherwise
rm -rf $temp_dir

```

### S3.2. Input file for inner-coordination sphere of the *trans*-HPhen1<sub>2</sub>:Ni<sup>2+</sup> complex (BP86).

```

#$ -S /bin/bash
#$ -cwd

#$ -o output
#$ -e $JOB_ID.err
#$ -j y
#$ -M rradford@ucsd.edu
#$ -m beas
#$ -N phentransu
#$ -q adf.q
#$ -pe mpi 8

export cur_dir=`pwd`
echo Running as user `whoami` on `hostname` at `date` in dir `pwd`
export temp_dir="/state/partition1/`whoami`.$JOB_ID"
mkdir $temp_dir

```

```

cd $temp_dir
echo With temp dir $temp_dir

# ADF enviroment variables, change as you need

export ADFHOME=/share/apps/adf2007.01/
export ADFBIN=/share/apps/adf2007.01/bin
export ADFRESOURCES=/share/apps/adf2007.01/atomicdata
export SCMLICENSE=/share/apps/adf2007.01/license
export SCM_TMPDIR=$temp_dir
export SCM_USETMPDIR=yes
export NSCM=8
export SCM_IOBUFFERSIZE=512

#Put main code here *****

$ADFBIN/adf -n8 \
<<< "
TITLE Nicis geo opt

MAXMEMORYUSAGE 7000

RELATIVISTIC ZORA
CHARGE 2 2
UNRESTRICTED

SCF
  ITERATIONS 200
DIIS
END

XC
  LDA VWN
  GGA Becke Perdew
END

SYMMETRY NOSYM
ATOMS
C          0.00000000    0.00000000    0.00000000
C          1.49256122    0.00000000    0.00000000
C          2.42693295    1.01015667    0.00000000
N          2.24529015   -1.16582375    0.02218498
C          3.56299355   -0.83228914    0.02976203
N          3.70228499    0.48144472    0.01702533
C          10.99154846   3.29300696   -0.91732029
C          9.76649252    2.57572479   -0.45595145
C          8.42465811    2.76330770   -0.70507607
N          9.80690694    1.49498046    0.41145927
C          8.53483249    1.07600525    0.64896160
N          7.67565567    1.83081541   -0.01410612
Ni         5.65295941    1.28472803   -0.00859172
H          10.74625400   3.95654088   -1.75289337
H          11.43520195   3.90761729   -0.11919016
H          11.76432279   2.59203105   -1.26701389
H          10.64217050   1.07372238    0.79822072
H          8.25741807    0.24781706    1.28724959

```

|   |             |             |             |
|---|-------------|-------------|-------------|
| H | 7.96193740  | 3.50267040  | -1.34772477 |
| H | -0.40717928 | -0.69538441 | -0.74906712 |
| H | -0.41369760 | -0.28481885 | 0.98041905  |
| H | -0.37511359 | 1.00135511  | -0.24127110 |
| H | 2.25463114  | 2.07933432  | -0.00449593 |
| H | 4.38130839  | -1.54009742 | 0.02399485  |
| H | 1.87848777  | -2.10952611 | 0.01533945  |
| C | 4.69855903  | 3.62551319  | -3.91832339 |
| C | 6.95525440  | -2.59797330 | -1.71575989 |
| C | 4.82493173  | 3.30322448  | -2.55556408 |
| C | 6.59448059  | -1.57173263 | -0.83928322 |
| C | 5.03901876  | 2.65560725  | -4.87776834 |
| C | 6.86023116  | -2.36135354 | -3.10540865 |
| C | 5.83549531  | 0.42080423  | -5.40286890 |
| C | 6.29574577  | -0.85678871 | -5.02648906 |
| C | 5.49251641  | 1.39752677  | -4.46428509 |
| C | 6.41742319  | -1.13716794 | -3.63288255 |
| C | 5.60236718  | 1.12009014  | -3.07825958 |
| C | 6.06831524  | -0.14251271 | -2.65864971 |
| H | 6.37948554  | -1.10621310 | -7.06050337 |
| C | 4.55281559  | 5.02059536  | 2.00871462  |
| C | 6.83501076  | -1.40804771 | 3.46938692  |
| C | 4.92317427  | 4.10133629  | 1.01120462  |
| C | 6.70708636  | -0.93097127 | 2.16266644  |
| C | 4.64776446  | 4.63038406  | 3.35614212  |
| C | 6.48435915  | -0.55161228 | 4.53602595  |
| C | 5.20505617  | 2.94175924  | 5.01201474  |
| C | 5.65999496  | 1.65871079  | 5.37622809  |
| C | 5.10422279  | 3.34686458  | 3.67888899  |
| C | 6.01551740  | 0.75629719  | 4.33136710  |
| C | 5.46545152  | 2.45734126  | 2.63553763  |
| C | 5.91620355  | 1.16093150  | 2.95677486  |
| H | 5.77972003  | 2.51833853  | 7.10855185  |
| H | 4.34972070  | 4.59109841  | -4.21974834 |
| H | 7.29571029  | -3.54148639 | -1.34323765 |
| H | 4.57110116  | 4.02864600  | -1.81109536 |
| H | 6.65641476  | -1.72140320 | 0.21838538  |
| H | 4.95171578  | 2.87852403  | -5.92064240 |
| H | 7.13584618  | -3.14383389 | -3.78117552 |
| H | 4.20540236  | 5.99829608  | 1.74736174  |
| H | 7.19049349  | -2.39954196 | 3.65772485  |
| H | 4.85717991  | 4.37992148  | -0.01978279 |
| H | 6.96446737  | -1.55718134 | 1.33410385  |
| H | 4.37187037  | 5.31264037  | 4.13287167  |
| H | 6.57952556  | -0.91303750 | 5.53863014  |
| N | 6.53384187  | -1.54391308 | -6.17473091 |
| N | 6.17197396  | -0.40312850 | -1.32792989 |
| N | 5.26394220  | 2.08581038  | -2.18284070 |
| N | 5.36006422  | 2.87344891  | 1.34557680  |
| N | 6.26208552  | 0.31021958  | 1.95269374  |
| N | 5.63233111  | 1.60284057  | 6.73419909  |
| H | 6.35379620  | 0.99043632  | 7.05738502  |
| H | 6.86337833  | -2.48716750 | -6.13378188 |
| H | 5.74549280  | 0.65106919  | -6.44391529 |
| H | 4.92724985  | 3.62946358  | 5.78323869  |

END

GEOMETRY

```

GO
ITERATIONS 100
FREQUENCIES
END

BASIS
  type TZ2P
  core none
END

END INPUT
"
# end main code *****

cp * $cur_dir/

# Optional, have to manually clean up otherwise
rm -rf $temp_dir

```

### S3.3. Input file for the inner-coordination sphere of the *cis*-HPhen<sub>12</sub>:Ni<sup>2+</sup> complex (OLYP).

```

#$ -S /bin/bash
#$ -cwd

#$ -o output
#$ -e $JOB_ID.err
#$ -j y
#$ -M rradford@ucsd.edu
#$ -m beas
#$ -N phencisu
#$ -q adf.q
#$ -pe mpi 8

export cur_dir=`pwd`
echo Running as user `whoami` on `hostname` at `date` in dir `pwd`
export temp_dir="/state/partition1/`whoami`.$JOB_ID"
mkdir $temp_dir
cd $temp_dir
echo With temp dir $temp_dir

# ADF enviroment variables, change as you need

export ADFHOME=/share/apps/adf2007.01/
export ADFBIN=/share/apps/adf2007.01/bin
export ADFRESOURCES=/share/apps/adf2007.01/atomicdata
export SCMLICENSE=/share/apps/adf2007.01/license
export SCM_TMPDIR=$temp_dir
export SCM_USETMPDIR=yes
export NSCM=8
export SCM_IOBUFFERSIZE=512

#Put main code here *****

```

```
$ADFBIN/adf -n8 \  
<<< "  
TITLE phencisu geo opt
```

```
MAXMEMORYUSAGE 7000
```

```
RELATIVISTIC ZORA  
CHARGE 2 2  
UNRESTRICTED
```

```
SCF  
  ITERATIONS 200  
DIIS  
END
```

```
XC  
  GGA OLYP  
END
```

```
SYMMETRY NOSYM  
ATOMS
```

|    |           |           |           |
|----|-----------|-----------|-----------|
| C  | 3.646596  | -2.316668 | 4.277425  |
| C  | 2.833686  | -1.391510 | 3.436131  |
| C  | 2.013071  | -1.604722 | 2.352389  |
| N  | 2.746520  | -0.034432 | 3.665771  |
| C  | 1.903356  | 0.513799  | 2.756207  |
| N  | 1.422419  | -0.417429 | 1.942404  |
| C  | -2.649755 | 2.580494  | 4.907523  |
| C  | -2.308750 | 1.713671  | 3.742030  |
| C  | -1.224684 | 1.686317  | 2.896374  |
| N  | -3.137450 | 0.719682  | 3.258844  |
| C  | -2.554965 | 0.144277  | 2.178770  |
| N  | -1.382143 | 0.711045  | 1.920150  |
| Ni | -0.028201 | -0.006653 | 0.424470  |
| H  | 4.670080  | -1.941386 | 4.422577  |
| H  | 3.195299  | -2.455701 | 5.271509  |
| H  | 3.714716  | -3.299681 | 3.799774  |
| H  | 1.836712  | -2.553224 | 1.866928  |
| H  | 3.247190  | 0.476222  | 4.383491  |
| H  | 1.694169  | 1.573972  | 2.712869  |
| H  | -3.068163 | 1.996252  | 5.739281  |
| H  | -1.752834 | 3.090709  | 5.275590  |
| H  | -3.386792 | 3.350546  | 4.633735  |
| H  | -0.353676 | 2.322632  | 2.952374  |
| H  | -4.029160 | 0.445007  | 3.658921  |
| H  | -3.008061 | -0.669231 | 1.631719  |
| C  | 2.677497  | -2.057177 | -2.413996 |
| C  | -1.592429 | -4.106877 | 1.117160  |
| C  | 1.141254  | 4.244071  | -0.034398 |
| C  | -2.503340 | 1.345639  | -3.033613 |
| C  | 1.654838  | -1.806142 | -1.479809 |
| C  | -0.871760 | -2.905274 | 1.240705  |
| C  | 0.489202  | 3.073904  | 0.374242  |
| C  | -1.619907 | 1.326428  | -1.945192 |
| C  | 3.464594  | -1.015916 | -2.859041 |
| C  | -2.509793 | -4.248525 | 0.097677  |
| C  | 2.221732  | 4.144150  | -0.893671 |
| C  | -3.245735 | 0.214422  | -3.314965 |



|   |           |           |           |
|---|-----------|-----------|-----------|
| C | 3.994734  | 1.422573  | -2.768319 |
| C | -3.660573 | -3.227535 | -1.861728 |
| C | -3.868044 | -2.157243 | -2.715900 |
| C | 3.735283  | 2.691459  | -2.287016 |
| C | -2.723287 | -3.173113 | -0.801541 |
| C | 3.233851  | 0.293062  | -2.366919 |
| C | -3.109502 | -0.933299 | -2.507489 |
| C | 2.635513  | 2.879400  | -1.356579 |
| C | -1.953744 | -1.994606 | -0.588017 |
| C | 2.186588  | 0.443244  | -1.419586 |
| C | -2.170293 | -0.865679 | -1.441780 |
| C | 1.895661  | 1.748291  | -0.909867 |
| H | 2.828423  | -3.070699 | -2.779410 |
| H | -1.413910 | -4.910208 | 1.829379  |
| H | 0.786443  | 5.210882  | 0.315460  |
| H | -2.591967 | 2.242985  | -3.642007 |
| H | 1.015973  | -2.611876 | -1.125248 |
| H | -0.142818 | -2.777550 | 2.032455  |
| H | -0.370588 | 3.117726  | 1.037222  |
| H | -1.030623 | 2.207235  | -1.699882 |
| H | 4.256382  | -1.187146 | -3.587089 |
| H | -3.075666 | -5.171376 | -0.020914 |
| H | 2.719557  | 5.051142  | -1.230210 |
| H | -3.922647 | 0.228220  | -4.167317 |
| N | -1.032116 | -1.876233 | 0.406975  |
| N | -1.448888 | 0.256478  | -1.172045 |
| N | 0.857259  | 1.856834  | -0.033405 |
| N | 1.413365  | -0.589434 | -0.994559 |
| N | 4.436660  | 3.791143  | -2.719318 |
| N | -4.750490 | -2.237688 | -3.751645 |
| H | -5.038287 | -1.424927 | -4.275334 |
| H | -5.319812 | -3.065768 | -3.862516 |
| H | 5.227603  | 3.628933  | -3.330166 |
| H | 4.555621  | 4.580847  | -2.097873 |
| H | 4.809494  | 1.272918  | -3.476648 |
| H | -4.233844 | -4.143327 | -1.999235 |

END

GEOMETRY  
GO  
ITERATIONS 100  
FREQUENCIES  
END

BASIS  
type TZ2P  
core none  
END

END INPUT  
"  
# end main code \*\*\*\*\*

cp \* \$cur\_dir/

# Optional, have to manually clean up otherwise  
rm -rf \$temp\_dir

### S3.4. Input file for inner-coordination sphere of the *trans*-HPhen1<sub>2</sub>:Ni<sup>2+</sup> complex (OLYP).

```
#$ -S /bin/bash
#$ -cwd

#$ -o output
#$ -e $JOB_ID.err
#$ -j y
#$ -M rradford@ucsd.edu
#$ -m beas
#$ -N phentransu
#$ -q adf.q
#$ -pe mpi 8

export cur_dir="`pwd`"
echo Running as user `whoami` on `hostname` at `date` in dir `pwd`
export temp_dir="/state/partition1/`whoami`.$JOB_ID"
mkdir $temp_dir
cd $temp_dir
echo With temp dir $temp_dir

# ADF enviroment variables, change as you need

export ADFHOME=/share/apps/adf2007.01/
export ADFBIN=/share/apps/adf2007.01/bin
export ADFRESOURCES=/share/apps/adf2007.01/atomicdata
export SCMLICENSE=/share/apps/adf2007.01/license
export SCM_TMPDIR=$temp_dir
export SCM_USETMPDIR=yes
export NSCM=8
export SCM_IOBUFFERSIZE=512

#Put main code here *****

$ADFBIN/adf -n8 \
<<< "
TITLE phentransu geo opt

MAXMEMORYUSAGE 7000

RELATIVISTIC ZORA
CHARGE 2 2
UNRESTRICTED

SCF
  ITERATIONS 200
DIIS
END

XC
  GGA OLYP
END

SYMMETRY NOSYM
```

## ATOMS

|    |           |           |           |
|----|-----------|-----------|-----------|
| C  | -0.346320 | -0.738165 | -5.586200 |
| C  | -0.225678 | -0.176541 | -4.209579 |
| C  | -0.291713 | -0.757351 | -2.964659 |
| N  | 0.021772  | 1.161285  | -3.956126 |
| C  | 0.096019  | 1.359410  | -2.620295 |
| N  | -0.085666 | 0.203620  | -1.987482 |
| C  | -0.459579 | -1.582978 | 5.244033  |
| C  | -0.185467 | -0.866345 | 3.965354  |
| C  | -0.326274 | -1.221924 | 2.643056  |
| N  | 0.320230  | 0.420290  | 3.927617  |
| C  | 0.459001  | 0.810902  | 2.641828  |
| N  | 0.075946  | -0.171756 | 1.831264  |
| Ni | 0.005717  | -0.037581 | -0.084331 |
| H  | -1.109517 | -2.443260 | 5.068453  |
| H  | 0.465910  | -1.945290 | 5.712392  |
| H  | -0.962548 | -0.924731 | 5.962669  |
| H  | 0.539070  | 0.993274  | 4.735904  |
| H  | 0.809418  | 1.788051  | 2.346498  |
| H  | -0.679654 | -2.158784 | 2.235337  |
| H  | -1.120195 | -0.218666 | -6.168294 |
| H  | 0.601940  | -0.656343 | -6.136656 |
| H  | -0.614800 | -1.798301 | -5.539212 |
| H  | -0.457102 | -1.795527 | -2.718850 |
| H  | 0.254118  | 2.321523  | -2.157662 |
| H  | 0.131708  | 1.885394  | -4.658142 |
| C  | -3.667215 | -1.808998 | -0.024867 |
| C  | 1.372982  | -4.798541 | -1.116702 |
| C  | -1.470899 | 4.772514  | 0.879471  |
| C  | 3.716954  | 1.662150  | 0.146046  |
| C  | -2.316492 | -1.457624 | -0.122741 |
| C  | 0.512624  | -3.708703 | -0.888785 |
| C  | -0.627902 | 3.742759  | 0.440954  |
| C  | 2.360206  | 1.363205  | 0.043886  |
| C  | -4.586869 | -0.822324 | 0.248284  |
| C  | 2.731068  | -4.593394 | -1.027383 |
| C  | -2.805933 | 4.476470  | 1.069416  |
| C  | 4.624213  | 0.626383  | 0.030811  |
| C  | -5.083844 | 1.535971  | 0.743896  |
| C  | 4.617092  | -3.040369 | -0.656645 |
| C  | 5.112044  | -1.779425 | -0.406621 |
| C  | -4.691558 | 2.838845  | 0.965628  |
| C  | 3.226241  | -3.299476 | -0.729788 |
| C  | -4.158220 | 0.515396  | 0.423302  |
| C  | 4.178053  | -0.685124 | -0.220705 |
| C  | -3.286309 | 3.173541  | 0.825214  |
| C  | 2.267267  | -2.259641 | -0.534326 |
| C  | -2.766414 | 0.807059  | 0.274022  |
| C  | 2.766525  | -0.923727 | -0.290586 |
| C  | -2.332139 | 2.179803  | 0.440134  |
| H  | -3.963640 | -2.847615 | -0.148170 |
| H  | 0.961689  | -5.776431 | -1.359660 |
| H  | -1.079214 | 5.771146  | 1.059921  |
| H  | 4.037321  | 2.686166  | 0.321973  |
| H  | -1.540853 | -2.198145 | -0.291687 |
| H  | -0.567106 | -3.860646 | -0.959516 |
| H  | 0.426374  | 3.959220  | 0.251335  |
| H  | 1.601208  | 2.136761  | 0.126080  |

|   |           |           |           |
|---|-----------|-----------|-----------|
| H | -5.645246 | -1.058569 | 0.345307  |
| H | 3.433727  | -5.409357 | -1.191583 |
| H | -3.475379 | 5.258726  | 1.421736  |
| H | 5.684443  | 0.841191  | 0.144729  |
| N | -1.025593 | 2.490400  | 0.238543  |
| N | -1.882405 | -0.199374 | 0.011860  |
| N | 0.930944  | -2.480418 | -0.598479 |
| N | 1.897898  | 0.121220  | -0.139467 |
| N | 6.461982  | -1.546591 | -0.283679 |
| N | -5.585278 | 3.798834  | 1.357908  |
| H | -5.389017 | 4.776922  | 1.198641  |
| H | -6.570461 | 3.562865  | 1.368737  |
| H | 6.828704  | -0.635127 | -0.508371 |
| H | 7.082638  | -2.304932 | -0.543188 |
| H | -6.136003 | 1.265597  | 0.828404  |
| H | 5.307210  | -3.867899 | -0.819032 |

END

GEOMETRY  
GO  
ITERATIONS 100  
FREQUENCIES  
END

BASIS  
type TZ2P  
core none  
END

END INPUT  
"  
# end main code \*\*\*\*\*

cp \* \$cur\_dir/

# Optional, have to manually clean up otherwise  
rm -rf \$temp\_dir

## Section S4. Results From DFT Calculations

### S4.1. Optimized cartesian coordinates and molecular structure for the inner-coordination sphere of the *cis*-HPhen<sub>1</sub><sub>2</sub>:Ni<sup>2+</sup> complex (BP86).

```
<Feb24-2010> <20:18:19> Geometry Converged
Coordinates in Geometry Cycle 59
Atom      X           Y           Z (Angstrom)
1.C       3.646596   -2.316668   4.277425
2.C       2.833686   -1.391510   3.436131
3.C       2.013071   -1.604722   2.352389
4.N       2.746520   -0.034432   3.665771
5.C       1.903356   0.513799    2.756207
6.N       1.422419   -0.417429   1.942404
7.C       -2.649755   2.580494    4.907523
8.C       -2.308750   1.713671    3.742030
9.C       -1.224684   1.686317    2.896374
10.N      -3.137450   0.719682    3.258844
11.C      -2.554965   0.144277    2.178770
12.N      -1.382143   0.711045    1.920150
13.Ni     -0.028201   -0.006653    0.424470
14.H      4.670080   -1.941386    4.422577
15.H      3.195299   -2.455701    5.271509
16.H      3.714716   -3.299681    3.799774
17.H      1.836712   -2.553224    1.866928
18.H      3.247190   0.476222    4.383491
19.H      1.694169   1.573972    2.712869
20.H     -3.068163   1.996252    5.739281
21.H     -1.752834   3.090709    5.275590
22.H     -3.386792   3.350546    4.633735
23.H     -0.353676   2.322632    2.952374
24.H     -4.029160   0.445007    3.658921
25.H     -3.008061   -0.669231    1.631719
26.C      2.677497   -2.057177   -2.413996
27.C     -1.592429   -4.106877    1.117160
28.C      1.141254   4.244071   -0.034398
29.C     -2.503340   1.345639   -3.033613
30.C      1.654838   -1.806142   -1.479809
31.C     -0.871760   -2.905274    1.240705
32.C      0.489202   3.073904    0.374242
33.C     -1.619907   1.326428   -1.945192
34.C      3.464594   -1.015916   -2.859041
35.C     -2.509793   -4.248525    0.097677
36.C      2.221732   4.144150   -0.893671
37.C     -3.245735   0.214422   -3.314965
38.C      3.994734   1.422573   -2.768319
39.C     -3.660573   -3.227535   -1.861728
40.C     -3.868044   -2.157243   -2.715900
41.C      3.735283   2.691459   -2.287016
42.C     -2.723287   -3.173113   -0.801541
43.C      3.233851   0.293062   -2.366919
44.C     -3.109502   -0.933299   -2.507489
45.C      2.635513   2.879400   -1.356579
46.C     -1.953744   -1.994606   -0.588017
47.C      2.186588   0.443244   -1.419586
48.C     -2.170293   -0.865679   -1.441780
```

|      |           |           |           |
|------|-----------|-----------|-----------|
| 49.C | 1.895661  | 1.748291  | -0.909867 |
| 50.H | 2.828423  | -3.070699 | -2.779410 |
| 51.H | -1.413910 | -4.910208 | 1.829379  |
| 52.H | 0.786443  | 5.210882  | 0.315460  |
| 53.H | -2.591967 | 2.242985  | -3.642007 |
| 54.H | 1.015973  | -2.611876 | -1.125248 |
| 55.H | -0.142818 | -2.777550 | 2.032455  |
| 56.H | -0.370588 | 3.117726  | 1.037222  |
| 57.H | -1.030623 | 2.207235  | -1.699882 |
| 58.H | 4.256382  | -1.187146 | -3.587089 |
| 59.H | -3.075666 | -5.171376 | -0.020914 |
| 60.H | 2.719557  | 5.051142  | -1.230210 |
| 61.H | -3.922647 | 0.228220  | -4.167317 |
| 62.N | -1.032116 | -1.876233 | 0.406975  |
| 63.N | -1.448888 | 0.256478  | -1.172045 |
| 64.N | 0.857259  | 1.856834  | -0.033405 |
| 65.N | 1.413365  | -0.589434 | -0.994559 |
| 66.N | 4.436660  | 3.791143  | -2.719318 |
| 67.N | -4.750490 | -2.237688 | -3.751645 |
| 68.H | -5.038287 | -1.424927 | -4.275334 |
| 69.H | -5.319812 | -3.065768 | -3.862516 |
| 70.H | 5.227603  | 3.628933  | -3.330166 |
| 71.H | 4.555621  | 4.580847  | -2.097873 |
| 72.H | 4.809494  | 1.272918  | -3.476648 |
| 73.H | -4.233844 | -4.143327 | -1.999235 |

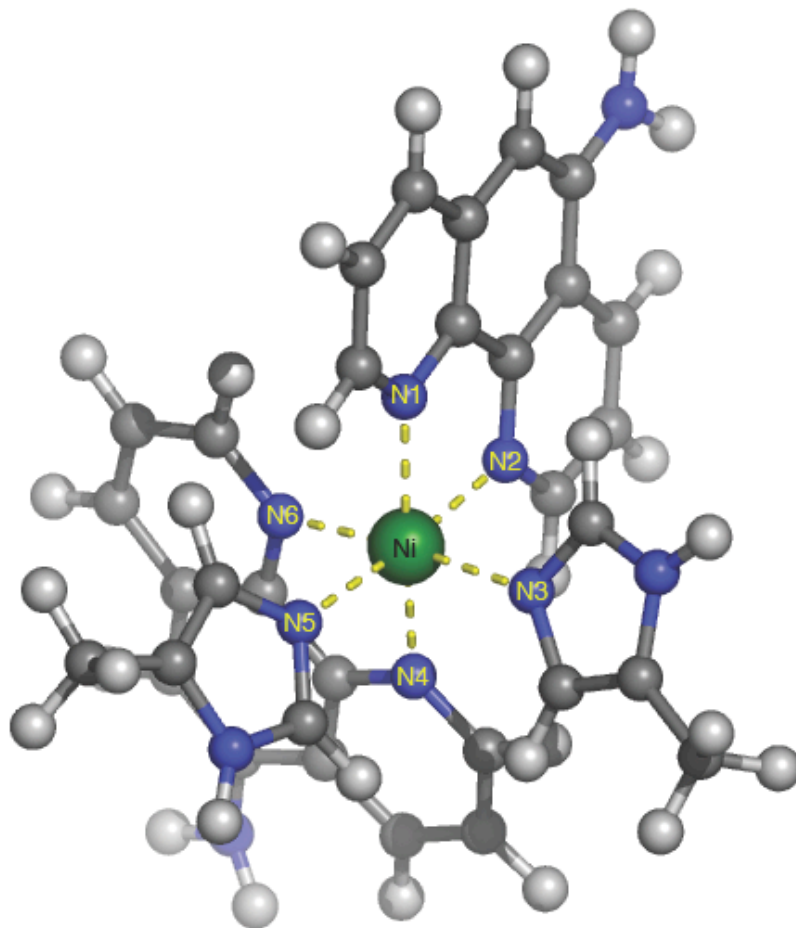

**Figure S4.2.** Computationally optimized geometry for the inner-sphere of the model *cis*-HPhen<sub>12</sub>:Ni<sup>2+</sup> complex (BP86).

**Table S4.3.** Calculated bond distances for the computationally minimized inner-coordination sphere of *cis*-HPhen<sub>1</sub><sub>2</sub>:Ni<sup>2+</sup> complex.

| <b>Bond (Å)</b> | <b><i>Cis</i>-<br/>HPhen<sub>1</sub><sub>2</sub>:Ni<sup>2+</sup><br/>Model</b> |
|-----------------|--------------------------------------------------------------------------------|
| Ni-N1           | 2.12                                                                           |
| Ni-N2           | 2.15                                                                           |
| Ni-N3           | 2.14                                                                           |
| Ni-N4           | 2.11                                                                           |
| Ni-N5           | 2.14                                                                           |
| Ni-N6           | 2.10                                                                           |

**Table S4.4.** Calculated bond angles the inner-coordination sphere of the computationally minimized *cis*-HPhen<sub>1</sub><sub>2</sub>:Ni<sup>2+</sup> complex (BP86).

| <b>Angle (°)</b> | <b><i>Cis</i>-<br/>HPhen<sub>1</sub><sub>2</sub>:Ni<sup>2+</sup><br/>Model</b> |
|------------------|--------------------------------------------------------------------------------|
| N1-Ni-N2         | 77.8                                                                           |
| N1-Ni-N3         | 90.1                                                                           |
| N1-Ni-N4         | 166.7                                                                          |
| N1-Ni-N5         | 99.0                                                                           |
| N1-Ni-N6         | 94.3                                                                           |
| N2-Ni-N3         | 93.4                                                                           |
| N2-Ni-N4         | 90.4                                                                           |
| N2-Ni-N5         | 175.5                                                                          |
| N2-Ni-N6         | 89.2                                                                           |
| N3-Ni-N4         | 96.8                                                                           |
| N3-Ni-N5         | 89.8                                                                           |
| N3-Ni-N6         | 175.3                                                                          |



**S4.5. Optimized cartesian coordinates and molecular structure for the inner-coordination sphere of the *trans*-HPhenI<sub>2</sub>:Ni<sup>2+</sup> complex.**

<Feb25-2010> <21:17:12> Geometry Converged

Coordinates in Geometry Cycle 26

| Atom  | X         | Y         | Z (Angstrom) |
|-------|-----------|-----------|--------------|
| 1.C   | 0.065415  | 0.502308  | 0.026248     |
| 2.C   | 1.538608  | 0.274729  | 0.063979     |
| 3.C   | 2.619108  | 1.124516  | -0.009279    |
| 4.N   | 2.100447  | -0.983148 | 0.192705     |
| 5.C   | 3.449462  | -0.867699 | 0.187827     |
| 6.N   | 3.801323  | 0.406944  | 0.067866     |
| 7.C   | 10.761681 | 3.644221  | -1.145690    |
| 8.C   | 9.674188  | 2.765409  | -0.627640    |
| 9.C   | 8.313574  | 2.733377  | -0.837653    |
| 10.N  | 9.908357  | 1.732628  | 0.262025     |
| 11.C  | 8.732863  | 1.129878  | 0.560269     |
| 12.N  | 7.736940  | 1.714418  | -0.095784    |
| 13.Ni | 5.748174  | 1.111962  | -0.029650    |
| 14.H  | 10.364085 | 4.344997  | -1.886160    |
| 15.H  | 11.221799 | 4.231618  | -0.338292    |
| 16.H  | 11.556113 | 3.057582  | -1.627718    |
| 17.H  | 10.812639 | 1.471646  | 0.639743     |
| 18.H  | 8.650923  | 0.299739  | 1.246552     |
| 19.H  | 7.726311  | 3.377660  | -1.478770    |
| 20.H  | -0.410788 | -0.088967 | -0.768204    |
| 21.H  | -0.410095 | 0.229276  | 0.978936     |
| 22.H  | -0.149425 | 1.557599  | -0.167191    |
| 23.H  | 2.608414  | 2.201708  | -0.111290    |
| 24.H  | 4.116481  | -1.714970 | 0.260784     |
| 25.H  | 1.586983  | -1.854751 | 0.266162     |
| 26.C  | 4.602335  | 3.542898  | -3.650128    |
| 27.C  | 7.086733  | -2.711133 | -2.020289    |
| 28.C  | 4.765395  | 3.097498  | -2.328030    |
| 29.C  | 6.761954  | -1.736063 | -1.074192    |
| 30.C  | 4.990623  | 2.726897  | -4.687452    |
| 31.C  | 6.945095  | -2.405659 | -3.358750    |
| 32.C  | 5.867591  | 0.530127  | -5.415866    |
| 33.C  | 6.339681  | -0.738507 | -5.132009    |
| 34.C  | 5.515620  | 1.443521  | -4.395251    |
| 35.C  | 6.491645  | -1.128452 | -3.741182    |
| 36.C  | 5.664111  | 1.095919  | -3.021578    |
| 37.C  | 6.168549  | -0.207783 | -2.698417    |
| 38.H  | 6.544714  | -1.348098 | -7.094767    |
| 39.C  | 4.610770  | 4.984522  | 1.904002     |
| 40.C  | 6.579978  | -1.412344 | 3.708425     |
| 41.C  | 4.990698  | 4.002458  | 0.972856     |
| 42.C  | 6.442552  | -0.987706 | 2.381731     |
| 43.C  | 4.608350  | 4.667815  | 3.244171     |
| 44.C  | 6.309324  | -0.510445 | 4.718710     |
| 45.C  | 5.146553  | 3.025875  | 5.015518     |
| 46.C  | 5.605309  | 1.789312  | 5.412660     |
| 47.C  | 5.019220  | 3.377609  | 3.646906     |
| 48.C  | 5.905216  | 0.796455  | 4.394951     |
| 49.C  | 5.350467  | 2.439305  | 2.625921     |
| 50.C  | 5.778903  | 1.131503  | 3.010477     |
| 51.H  | 5.616521  | 2.198872  | 7.418898     |
| 52.H  | 4.168265  | 4.523643  | -3.833763    |

|      |          |           |           |
|------|----------|-----------|-----------|
| 53.H | 7.446194 | -3.685401 | -1.695523 |
| 54.H | 4.416262 | 3.721672  | -1.515641 |
| 55.H | 6.889193 | -1.958353 | -0.022354 |
| 56.H | 4.878881 | 3.041467  | -5.723575 |
| 57.H | 7.191974 | -3.164027 | -4.099185 |
| 58.H | 4.335450 | 5.976367  | 1.554624  |
| 59.H | 6.884643 | -2.433542 | 3.923655  |
| 60.H | 5.053669 | 4.267213  | -0.075362 |
| 61.H | 6.650957 | -1.694879 | 1.586046  |
| 62.H | 4.322470 | 5.403923  | 3.994217  |
| 63.H | 6.389897 | -0.832573 | 5.755382  |
| 64.N | 6.647464 | -1.616858 | -6.126208 |
| 65.N | 6.299557 | -0.522743 | -1.382094 |
| 66.N | 5.315593 | 1.925927  | -2.001498 |
| 67.N | 5.309467 | 2.753708  | 1.298257  |
| 68.N | 6.065443 | 0.236030  | 2.020178  |
| 69.N | 5.731526 | 1.457417  | 6.738334  |
| 70.H | 6.397917 | 0.749342  | 7.015132  |
| 71.H | 7.014368 | -2.537382 | -5.948192 |
| 72.H | 5.742397 | 0.838611  | -6.452824 |
| 73.H | 4.905059 | 3.779652  | 5.764288  |

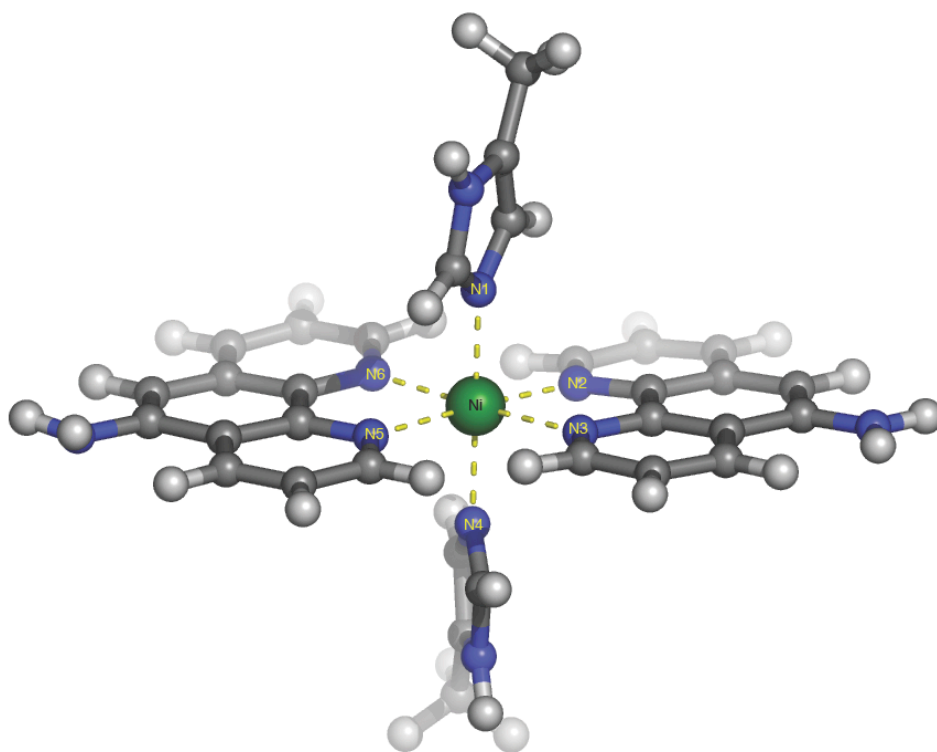

**Figure S4.6.** Optimized geometry of the inner-coordination sphere of the *trans*-HPhen<sub>12</sub>:Ni<sup>2+</sup> complex (BP86).

**Table S4.7.** Calculated bond distances for the computational minimized inner-coordination sphere of the *trans*-HPhen1<sub>2</sub>:Ni<sup>2+</sup> complex (BP86).

| <b>Bond (Å)</b> | <b><i>trans</i>-<br/>HPhen1<sub>2</sub>:Ni<sup>2+</sup><br/>Model</b> |
|-----------------|-----------------------------------------------------------------------|
| Ni-N1           | 2.08                                                                  |
| Ni-N2           | 2.18                                                                  |
| Ni-N3           | 2.19                                                                  |
| Ni-N4           | 2.25                                                                  |
| Ni-N5           | 2.16                                                                  |
| Ni-N6           | 2.07                                                                  |

**Table S4.8** Calculated bond angles for the computationally minimized inner-coordination sphere of the HPhen1<sub>2</sub>:Ni<sup>2+</sup> complex (BP86).

| <b>Angle (°)</b> | <b>Model</b> |
|------------------|--------------|
| N1-Ni-N2         | 93.0         |
| N1-Ni-N3         | 87.4         |
| N1-Ni-N4         | 90.4         |
| N1-Ni-N5         | 89.6         |
| N1-Ni-N6         | 176.8        |
| N2-Ni-N3         | 76.7         |
| N2-Ni-N4         | 176.6        |
| N2-Ni-N5         | 103.4        |
| N2-Ni-N6         | 89.0         |
| N3-Ni-N4         | 103.6        |
| N3-Ni-N5         | 177.0        |
| N3-Ni-N6         | 90.6         |

**S4.9** Optimized cartesian coordinates for the inner-coordination sphere of the *cis*-HPhen<sub>12</sub>:Ni<sup>2+</sup> complex (OLYP).

<Feb27-2010> <07:11:25> Geometry Converged

Coordinates in Geometry Cycle 13

| Atom  | X         | Y         | Z (Angstrom) |
|-------|-----------|-----------|--------------|
| 1.C   | 3.713803  | -2.392940 | 4.257187     |
| 2.C   | 2.896331  | -1.451127 | 3.440179     |
| 3.C   | 2.081145  | -1.619910 | 2.346650     |
| 4.N   | 2.803770  | -0.105677 | 3.721713     |
| 5.C   | 1.967507  | 0.472253  | 2.833562     |
| 6.N   | 1.490425  | -0.421308 | 1.981880     |
| 7.C   | -2.716451 | 2.614526  | 4.972299     |
| 8.C   | -2.371958 | 1.764641  | 3.796451     |
| 9.C   | -1.262008 | 1.700191  | 2.990533     |
| 10.N  | -3.220818 | 0.816594  | 3.269257     |
| 11.C  | -2.627312 | 0.236173  | 2.203865     |
| 12.N  | -1.422789 | 0.747912  | 1.995832     |
| 13.Ni | -0.031127 | -0.003427 | 0.429434     |
| 14.H  | 4.751508  | -2.054229 | 4.347301     |
| 15.H  | 3.307549  | -2.493390 | 5.270728     |
| 16.H  | 3.723395  | -3.384484 | 3.801801     |
| 17.H  | 1.915609  | -2.532706 | 1.798518     |
| 18.H  | 3.287325  | 0.375940  | 4.466211     |
| 19.H  | 1.760717  | 1.527576  | 2.841783     |
| 20.H  | -3.001167 | 2.008995  | 5.839607     |
| 21.H  | -1.860154 | 3.227312  | 5.260596     |
| 22.H  | -3.550549 | 3.289514  | 4.748782     |
| 23.H  | -0.366970 | 2.289442  | 3.090818     |
| 24.H  | -4.136423 | 0.579033  | 3.624756     |
| 25.H  | -3.101715 | -0.541999 | 1.630498     |
| 26.C  | 2.703242  | -2.029957 | -2.422951    |
| 27.C  | -1.656310 | -4.126880 | 1.122740     |
| 28.C  | 1.175843  | 4.276247  | -0.068911    |
| 29.C  | -2.555512 | 1.322035  | -3.024046    |
| 30.C  | 1.688392  | -1.776001 | -1.485937    |
| 31.C  | -0.957732 | -2.917399 | 1.269678     |
| 32.C  | 0.523200  | 3.111178  | 0.343274     |
| 33.C  | -1.673185 | 1.302255  | -1.939374    |
| 34.C  | 3.480315  | -0.988263 | -2.876155    |
| 35.C  | -2.526658 | -4.281161 | 0.068030     |
| 36.C  | 2.255043  | 4.169924  | -0.924041    |
| 37.C  | -3.276674 | 0.184755  | -3.319009    |
| 38.C  | 4.008859  | 1.442241  | -2.793994    |
| 39.C  | -3.647744 | -3.269100 | -1.906241    |
| 40.C  | -3.865236 | -2.199774 | -2.752213    |
| 41.C  | 3.764517  | 2.711391  | -2.315571    |
| 42.C  | -2.728531 | -3.208198 | -0.832873    |
| 43.C  | 3.247893  | 0.318245  | -2.386570    |
| 44.C  | -3.125101 | -0.969652 | -2.526835    |
| 45.C  | 2.667328  | 2.904911  | -1.384195    |
| 46.C  | -1.976154 | -2.025429 | -0.600407    |
| 47.C  | 2.207108  | 0.470635  | -1.434986    |
| 48.C  | -2.191393 | -0.896494 | -1.455953    |
| 49.C  | 1.923177  | 1.779218  | -0.930121    |
| 50.H  | 2.855910  | -3.042910 | -2.781057    |

|      |           |           |           |
|------|-----------|-----------|-----------|
| 51.H | -1.500637 | -4.923780 | 1.842979  |
| 52.H | 0.822342  | 5.243079  | 0.273968  |
| 53.H | -2.658160 | 2.223268  | -3.618983 |
| 54.H | 1.060908  | -2.582621 | -1.127127 |
| 55.H | -0.284864 | -2.772206 | 2.103493  |
| 56.H | -0.337114 | 3.167551  | 0.997728  |
| 57.H | -1.099298 | 2.185053  | -1.692237 |
| 58.H | 4.266931  | -1.158423 | -3.605769 |
| 59.H | -3.072191 | -5.210556 | -0.070791 |
| 60.H | 2.749618  | 5.074807  | -1.259615 |
| 61.H | -3.947819 | 0.201225  | -4.170843 |
| 62.N | -1.088137 | -1.899402 | 0.421176  |
| 63.N | -1.486175 | 0.230433  | -1.177310 |
| 64.N | 0.888426  | 1.895507  | -0.055899 |
| 65.N | 1.442788  | -0.562921 | -1.003362 |
| 66.N | 4.480483  | 3.798913  | -2.762165 |
| 67.N | -4.728298 | -2.296529 | -3.807449 |
| 68.H | -5.101777 | -1.473540 | -4.246055 |
| 69.H | -5.322769 | -3.107583 | -3.869982 |
| 70.H | 5.303879  | 3.599058  | -3.310092 |
| 71.H | 4.613284  | 4.577822  | -2.137835 |
| 72.H | 4.815076  | 1.285258  | -3.504867 |
| 73.H | -4.204924 | -4.189548 | -2.053730 |

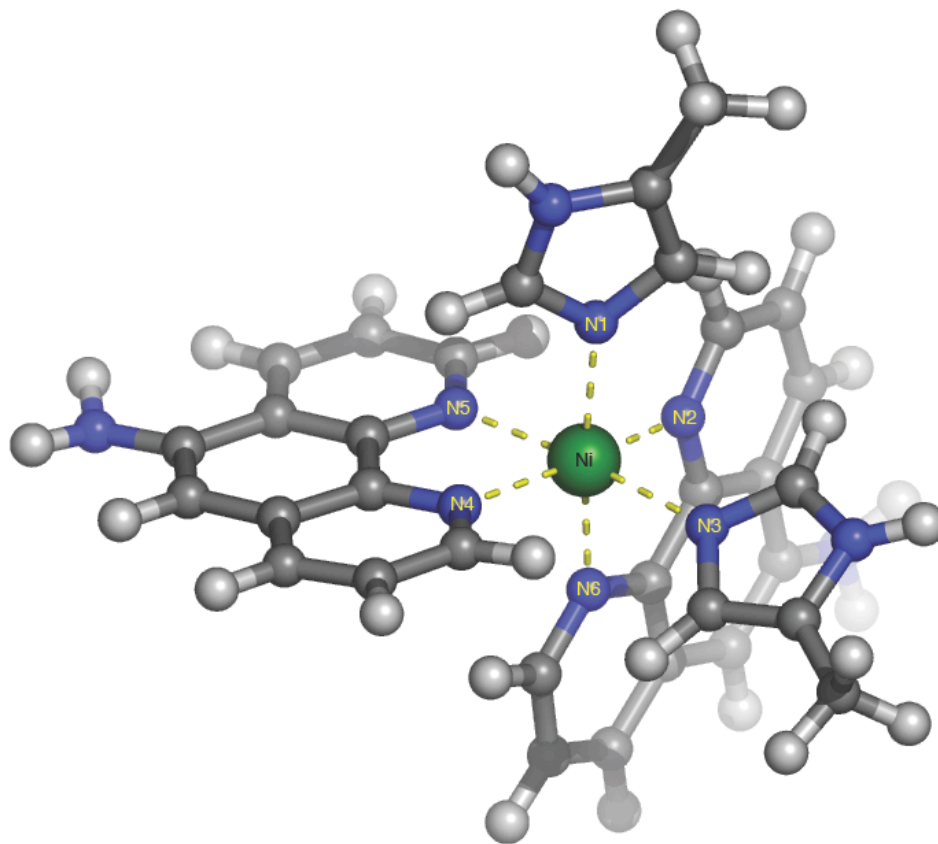

**Figure S4.10.** Optimized geometry of the inner-coordination sphere for the HPhen<sub>12</sub>:Ni<sup>2+</sup> complex (OLYP).

| Bond (Å) | Model |
|----------|-------|
| Ni-N1    | 2.23  |
| Ni-N2    | 2.16  |
| Ni-N3    | 2.21  |
| Ni-N4    | 2.17  |
| Ni-N5    | 2.18  |
| Ni-N6    | 2.13  |

**Table S4.11.** Calculated bond distances for the computationally minimized inner-coordination sphere of the HPhen1<sub>2</sub>:Ni<sup>2+</sup> complex (OLYP).

| Angle (°) | Model  |
|-----------|--------|
| N1-Ni-N2  | 97.3   |
| N1-Ni-N3  | 89.9   |
| N1-Ni-N4  | 89.6   |
| N1-Ni-N5  | 93.7   |
| N1-Ni-N6  | 173.9  |
| N2-Ni-N3  | 91.7   |
| N2-Ni-N4  | 166.4  |
| N2-Ni-N5  | 91.4   |
| N2-Ni-N6  | 77.6   |
| N3-Ni-N4  | 99.9   |
| N3-Ni-N5  | 174.77 |
| N3-Ni-N6  | 86.9   |

**Table S4.12.** Calculated bond angles for the computationally minimized inner-coordination sphere for the HPhen1<sub>2</sub>:Ni<sup>2+</sup> complex (OLYP).

**S4.13** Optimized cartesian coordinates for inner-coordination sphere of the *trans*-HPhen<sub>12</sub>:Ni<sup>2+</sup> complex (OLYP).

<Feb27-2010> <10:39:01> Geometry Converged

Coordinates in Geometry Cycle 17

| Atom  | X         | Y         | Z (Angstrom) |
|-------|-----------|-----------|--------------|
| 1.C   | -0.378602 | -0.741591 | -5.837344    |
| 2.C   | -0.229027 | -0.168909 | -4.469181    |
| 3.C   | -0.307592 | -0.721247 | -3.214199    |
| 4.N   | 0.054664  | 1.159724  | -4.234325    |
| 5.C   | 0.133734  | 1.365555  | -2.901788    |
| 6.N   | -0.079810 | 0.236484  | -2.243113    |
| 7.C   | -0.527704 | -1.757903 | 5.379347     |
| 8.C   | -0.229236 | -1.001967 | 4.129398     |
| 9.C   | -0.374093 | -1.297311 | 2.795375     |
| 10.N  | 0.319648  | 0.262845  | 4.138104     |
| 11.C  | 0.481092  | 0.681448  | 2.865477     |
| 12.N  | 0.067513  | -0.245462 | 2.014534     |
| 13.Ni | -0.006733 | -0.044517 | -0.122052    |
| 14.H  | -1.085650 | -2.667195 | 5.150417     |
| 15.H  | 0.390813  | -2.048931 | 5.901143     |
| 16.H  | -1.130335 | -1.160807 | 6.072516     |
| 17.H  | 0.551011  | 0.799250  | 4.961693     |
| 18.H  | 0.889996  | 1.646975  | 2.620557     |
| 19.H  | -0.765535 | -2.204433 | 2.364435     |
| 20.H  | -1.179313 | -0.246482 | -6.397915    |
| 21.H  | 0.545662  | -0.641967 | -6.417704    |
| 22.H  | -0.620723 | -1.804085 | -5.778470    |
| 23.H  | -0.512041 | -1.749996 | -2.968731    |
| 24.H  | 0.333620  | 2.333772  | -2.474468    |
| 25.H  | 0.172949  | 1.871274  | -4.941635    |
| 26.C  | -4.050286 | -1.839631 | -0.039377    |
| 27.C  | 1.188421  | -4.453450 | -0.861949    |
| 28.C  | -1.274739 | 4.462314  | 0.755860     |
| 29.C  | 4.052239  | 1.773969  | 0.097208     |
| 30.C  | -2.685858 | -1.576292 | -0.207221    |
| 31.C  | 0.442512  | -3.288670 | -0.631410    |
| 32.C  | -0.538406 | 3.334844  | 0.383518     |
| 33.C  | 2.676488  | 1.556365  | 0.028591     |
| 34.C  | -4.880948 | -0.810739 | 0.329920     |
| 35.C  | 2.559550  | -4.376736 | -0.861394    |
| 36.C  | -2.626663 | 4.318086  | 0.981258     |
| 37.C  | 4.895555  | 0.691122  | -0.029420    |
| 38.C  | -5.162442 | 1.586295  | 0.835925     |
| 39.C  | 4.583750  | -2.981532 | -0.628216    |
| 40.C  | 5.196463  | -1.763468 | -0.435821    |
| 41.C  | -4.659426 | 2.857988  | 0.983647     |
| 42.C  | 3.177400  | -3.125882 | -0.637850    |
| 43.C  | -4.340007 | 0.481732  | 0.512627     |
| 44.C  | 4.362164  | -0.591798 | -0.244728    |
| 45.C  | -3.232803 | 3.059629  | 0.815279     |
| 46.C  | 2.329500  | -1.998286 | -0.445537    |
| 47.C  | -2.939435 | 0.647192  | 0.319831     |
| 48.C  | 2.940817  | -0.714344 | -0.268027    |
| 49.C  | -2.383634 | 1.962403  | 0.469449     |

|      |           |           |           |
|------|-----------|-----------|-----------|
| 50.H | -4.425637 | -2.844044 | -0.204101 |
| 51.H | 0.673787  | -5.393868 | -1.031793 |
| 52.H | -0.782833 | 5.423257  | 0.867869  |
| 53.H | 4.436432  | 2.775893  | 0.253859  |
| 54.H | -2.031560 | -2.377978 | -0.503633 |
| 55.H | -0.633803 | -3.367705 | -0.617764 |
| 56.H | 0.520231  | 3.452180  | 0.189053  |
| 57.H | 2.002962  | 2.394558  | 0.117857  |
| 58.H | -5.945653 | -0.974594 | 0.468231  |
| 59.H | 3.169670  | -5.259334 | -1.030955 |
| 60.H | -3.203934 | 5.180911  | 1.294970  |
| 61.H | 5.965214  | 0.849458  | 0.048589  |
| 62.N | -1.049595 | 2.114191  | 0.258564  |
| 63.N | -2.125157 | -0.386292 | -0.024207 |
| 64.N | 0.974384  | -2.085140 | -0.434002 |
| 65.N | 2.120385  | 0.360954  | -0.128353 |
| 66.N | 6.563553  | -1.657262 | -0.368438 |
| 67.N | -5.471103 | 3.909545  | 1.338297  |
| 68.H | -5.231645 | 4.838762  | 1.034076  |
| 69.H | -6.464936 | 3.737826  | 1.313441  |
| 70.H | 7.006986  | -0.795827 | -0.636422 |
| 71.H | 7.096068  | -2.472285 | -0.632700 |
| 72.H | -6.228364 | 1.412843  | 0.947778  |
| 73.H | 5.190052  | -3.868274 | -0.787588 |

**Figure S4.14.** Optimized geometry for the computationally minimized inner-coordination sphere of the  $\text{HPhen}_2:\text{Ni}^{2+}$  complex (OLYP).

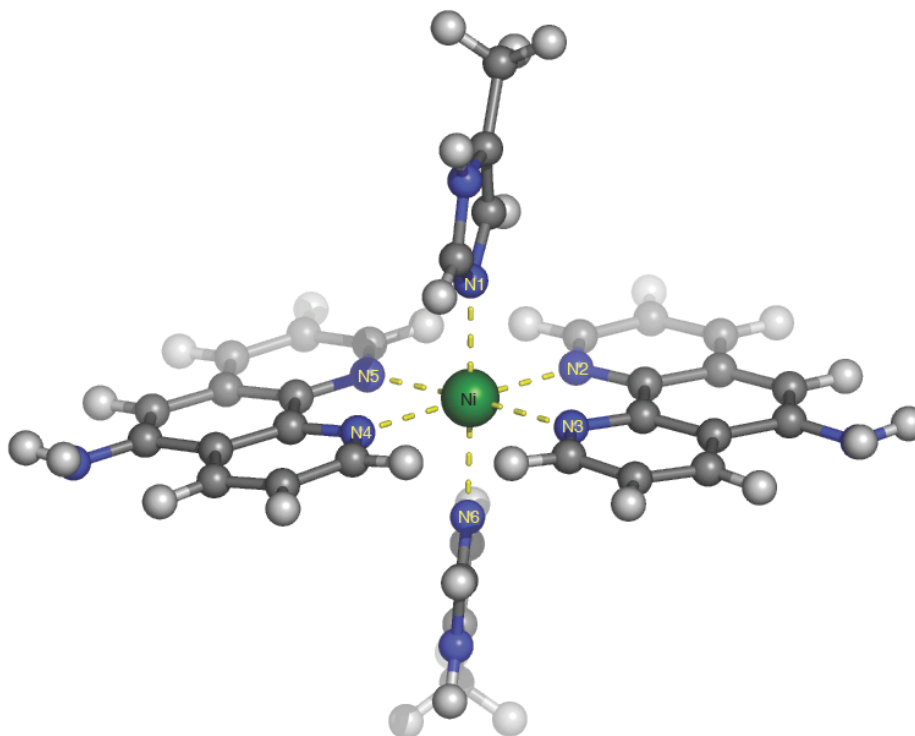



| Bond (Å) | Model |
|----------|-------|
| Ni-N1    | 2.14  |
| Ni-N2    | 2.29  |
| Ni-N3    | 2.17  |
| Ni-N4    | 2.43  |
| Ni-N5    | 2.15  |
| Ni-N6    | 2.15  |

**Table S4.15.** Calculated bond distances for computationally minimized inner-coordination sphere of the *trans*-HPhen<sub>1</sub><sub>2</sub>:Ni<sup>2+</sup> complex (OLYP).

| Angle (°) | Model |
|-----------|-------|
| N1-Ni-N2  | 89.8  |
| N1-Ni-N3  | 90.3  |
| N1-Ni-N4  | 91.3  |
| N1-Ni-N5  | 91.8  |
| N1-Ni-N6  | 177.8 |
| N2-Ni-N3  | 75.2  |
| N2-Ni-N4  | 178.8 |
| N2-Ni-N5  | 106.7 |
| N2-Ni-N6  | 92.1  |
| N3-Ni-N4  | 104.8 |
| N3-Ni-N5  | 177.0 |
| N3-Ni-N6  | 89.2  |

**Table S4.16.** Calculated bond angles for the computationally minimized inner-coordination sphere of the HPhen<sub>1</sub><sub>2</sub>:Ni<sup>2+</sup> complex (OLYP).
